# Supplementary material
Source: PubMed Central journal article supplement (PMC8006777)
Supplement: NIHMS1681490-supplement-SI_1.pdf [file NIHMS1681490-supplement-SI_1.pdf]

# Supporting Information

## ***De novo* design, solution characterization, and crystallographic structure of an abiological Mn-porphyrin binding protein capable of stabilizing a Mn(V) species**

Samuel I. Mann<sup>‡</sup>, Animesh Nayak<sup>§</sup>, George T. Gassner<sup>||</sup>, Michael J. Therien<sup>§</sup>, William F. DeGrado<sup>\*,‡</sup>

<sup>‡</sup>Department of Pharmaceutical Chemistry and the Cardiovascular Research Institute, University of California at San Francisco, San Francisco, California 94158-9001, United States

<sup>§</sup>Department of Chemistry, Duke University, Durham, NC 27708

<sup>||</sup>Department of Chemistry and Biochemistry, San Francisco State University, San Francisco, California 94132, USA.

### Contents

|                     |              |
|---------------------|--------------|
| <b>Methods</b>      | <b>S1-S6</b> |
| <b>Table S1</b>     | <b>S2</b>    |
| <b>Equation 1</b>   | <b>S5</b>    |
| <b>Fig. S1</b>      | <b>S7</b>    |
| <b>Fig. S2</b>      | <b>S7</b>    |
| <b>Fig. S3</b>      | <b>S8</b>    |
| <b>Fig. S4</b>      | <b>S8</b>    |
| <b>Fig. S5</b>      | <b>S9</b>    |
| <b>Fig. S6</b>      | <b>S10</b>   |
| <b>Fig. S7</b>      | <b>S11</b>   |
| <b>Fig. S8</b>      | <b>S12</b>   |
| <b>Table S2</b>     | <b>S13</b>   |
| <b>Fig. S9</b>      | <b>S13</b>   |
| <b>Fig. S10</b>     | <b>S14</b>   |
| <b>Fig. S11</b>     | <b>S14</b>   |
| <b>Fig. S12</b>     | <b>S15</b>   |
| <b>Fig. S13</b>     | <b>S16</b>   |
| <b>Fig. S14</b>     | <b>S17</b>   |
| <b>Fig. S15</b>     | <b>S18</b>   |
| <b>Fig. S16</b>     | <b>S19</b>   |
| <b>Fig. S17</b>     | <b>S20</b>   |
| <b>Fig. S18</b>     | <b>S21</b>   |
| <b>Fig. S19</b>     | <b>S22</b>   |
| <b>Fig. S20</b>     | <b>S22</b>   |
| <b>Fig. S21</b>     | <b>S23</b>   |
| <b>Table S3</b>     | <b>S24</b>   |
| <b>Rosetta Code</b> | <b>S24</b>   |
| <b>References</b>   | <b>S34</b>   |

## Methods

**MPP1 Design Process.** The design of MPP1 began with the parameterized backbone of the 4-helix bundle, PS1.<sup>1</sup> Like PS1, MPP1 utilized an axial His ligand and second-shell H-bonded Thr residue in the *d* and *b* positions of the heptad repeat, respectively, to bind the abiological porphyrin, [Mn<sup>III</sup>DPP]<sup>+</sup>, with a dioxygen unit bound in the open coordination site (trans to the axial His ligand). The cofactor was placed by hand, orienting the appended phenyl rings to sit down the long axis of the bundle. Due to the size of the cofactor relative to the Zn-porphyrin used in PS1, the protein was extended by ten residues. The remaining cofactor-free region of the protein was designated as the “folded core”. Because PS1 was soluble and expressed well in *E. coli*, we chose to retain the majority of the surface residues while computationally designing the interior residues in the binding site and folded core simultaneously. A flexible backbone sequence design protocol was used (see below) to design the parameterized backbone sequence and packing around the MnDPP(OOH) cofactor. Note that residue numbering here and in the main text is consistent with expressed MPP1, which contains a N-terminal 6xHis tag and TEV protease cleavage site.

**Loop Design.** Loops were selected using MASTER (Method of Accelerated Search for Tertiary Ensemble Representatives)<sup>2</sup>. Segments of adjacent helices (6 residues from each helix) were queried against a database of structures from the PDB. Using the “wgap” option in MASTER, loops of specified length connecting these helices were found within a given rmsd cutoff. These loops were then clustered on rmsd and scored based on number of outputs in a given cluster. Loops were chosen from well-populated clusters (Table S1). LoopAB and loopCD are two residues and constrained in the residue file to a Gly-Asp motif. This ensured favorable N-capping and C-capping interactions to support the folded core.<sup>3-4</sup> LoopBC had a lower representation than loopAB/CD but a large cluster was found nonetheless.

**Table S1.** Results from clustering loops output from MASTER for MPP1.

| Loop | Number loops in cluster (<1 Å) | Average r.m.s.d. (Å) | Loop Motif                     |
|------|--------------------------------|----------------------|--------------------------------|
| AB   | 200                            | 0.34 ± 0.03          | $\alpha_L\beta$                |
| BC   | 83                             | 0.85 ± 0.1           | $\alpha_L\beta\beta\beta\beta$ |
| CD   | 200                            | 0.27 ± 0.03          | $\alpha_L\beta$                |

**Flexible Backbone Sequence Design.** We wrote a RosettaScript for flexible backbone sequence design, implemented in Rosetta 3.5, that progresses through a cycle of backbone and side-chain relaxation and fixed backbone sequence design, with a filtering step based on packing score (see RosettaScript below).

**Amino acids allowed to vary during design.** To avoid deleterious oxidations within the active site we disallowed Tyr and Trp residues within 10 Å of the cofactor and disallowed Cys and Met residues throughout the protein. Additionally, no His residues were allowed except for the axial His ligand. The residue files (resfile\_ex1.txt, resfile\_ex3.txt, resfile\_aro.txt) are provided below showing exactly which residues were allowed to be designed. All 64 interior residues (except Thr27 and His64, which are keystone interactions for Mn binding) and loopBC were allowed to vary during design. Ultimately, 65% of the interior residues changed (relative to PS1) with the majority occurring in the binding site to accommodate the new cofactor (Fig. 2).

**Flexible backbone design protocol.** Distance and angle constraints (constraints.cst) between His and Mn and Thr and His were loaded, the sequence was designed with a fixed backbone, the sidechains and backbone were minimized, three trials of a Monte Carlo flexible backbone subprotocol were performed followed by one trial of an additional Monte Carlo flexible backbone protocol with additional rotamers allowed, and 100 models with packing score (pstat) > 0.48 were output. Designs were visualized with PyMol and analyzed for total score and pstat to choose MPP1.

**Flexible backbone design sub-protocol.** The flexible backbone design sub-protocol consists of three Monte Carlo trials of (1) fixed backbone design with ref2015 weights and the addition of extra rotamer sampling around  $\chi_1$  (ex1, level 1; i.e. sampled between 1 standard deviation of the mean chi angle value for each rotamer) and  $\chi_2$  (ex2, level 1) sidechain dihedrals, (2) fast relax minimization (with increased repulsive features from rosettacon2018 modifications). At the end of step (2), the model is filtered for native-like structure packing with PackStat (if 1 of 3 trials the PackStat score is > 0.48 the model passes the filter). This model then undergoes an additional Monte Carlo trial of (1) fixed backbone design as above, but with rotamers sampled between 2 full standard deviations of the mean chi angle (ex1, level 3) and sidechain dihedrals (ex2, level 3), (2) rosettacon2018-modified FastRelax, and (3) a final PackStat filter required pstat > 0.48. The final designed sequences of MPP1-4 selected for expression were as follows:

>MPP1

SEKEELFEKLLKQTADAEVQLFQRLREIFDKGDDDSFEQVLEEELEEALQKHRQLADQGRK  
KGLLTSEAAKQGDQFVQLFQRFREAWDKGDKDSLEQILEEELEQVAQKAVELGLKILKT  
Q

>MPP2

SEEIARKILEKLLKQTADAEVQLFQRLREIFDKGDDDSFEQVLEEELEEALQKHRQLADQGV  
KKGGLGSDEALKQGDQFLQLFQRFREAWDKGDKDSLEQILEEELEQVAQKAVELGLLKA  
ELT

>MPP3

AGELIAIAAEKLLKQTADAEVQIFQRLREIFDKGDDDSWEQVAEELEEALQKHRQIAENIV  
KKFEEGLKATRDLVIKQGDQFLILWQRYREAWDKGDKDSLEQILEEELEQVAQKAVELG  
LKAARSD

>MPP4

SEIEKLLKQTADAEVQIFQRLREIFDKGDDDSFEQVAEEFEEALQKHRQLYDNRPEFGTE  
VAKQGDQFVQLWQRFREAWDKGDKDSLEQILEEELEQVAQKAVELGLKKN

**Ab initio folding.** Rosetta *ab initio* folding prediction calculations<sup>5</sup> were performed on the MPP1 sequence in Rosetta 3.5. 10,000 structures were generated. C $\alpha$  RMSD of the folded core was scored against residues 4-29, 34-59, 66-86, and 91-115 of the design model. C $\alpha$  RMSD of the binding region was scored against residues 3-20, 47-59, 66-75, and 103-116 of the design model. C $\alpha$  RMSD of the folded core region was scored against residues 21-29, 34-46, 76-86, and 91-102 of the design model (Fig. S2).

**Size exclusion chromatography.** Gel filtration profiles were obtained using a Superdex 200 10/300 column on an FPLC system (GE Healthcare AKTA). 500  $\mu$ L of 500  $\mu$ M apo-MPP1 or 400  $\mu$ M holo-MPP1 was injected onto the column and eluted with a 50 mM MES, 150 mM NaCl, pH 7.5 buffer mobile phase at a flow rate of 0.3mL/min.

**Circular dichroism (CD).** CD spectra were collected on a Jasco J-810 CD spectrometer in a 0.1 cm path length quartz cuvette, using temperature/wavelength mode. Spectra were collected from 20 to 90  $^{\circ}$ C with an interval of 5  $^{\circ}$ C and an increase rate of 2  $^{\circ}$ C/minute, over a wavelength range from 200 to 250 nm. Apo- and holo-MPP1 were prepared at 9.6  $\mu$ M and 3.8  $\mu$ M, respectively, for 200-250 nm window and 375  $\mu$ M for the visible region in 50 mM MES, 150 mM NaCl pH 7.5.

**Electronic absorption spectroscopy.** Electronic absorption spectra were collected using an HP 8453 UV-Vis spectrophotometer or Cary 300 Bio spectrophotometer in a low-volume (750  $\mu$ L) 1-cm path-length quartz cuvette.

**Visualization of protein structures and image rendering.** Protein models were visualized and rendered in the PyMol visualization program.<sup>6</sup>

**Protein expression and purification.** The gene coding for the protein sequence of MPP1 was ordered from IDT, which was cloned into the IPTG-inducible pET-21a plasmid (cloning site NdeI-BamHI). The sequence also coded for an N-terminal 6xHis-tag followed by a TEV protease cleavage sequence, followed finally by the designed sequence. The cloned gene sequence is:

```
ATGCATCACCACCACCACGAGAACCTGTACTTCCAAAGCAGCGAGAAAGAGGA
GCTGTTTGAAAAGCTGAAACAGACCGCGGATGAGGCGGTGCAGCTGTTCCAACGTC
TGCGTGAAATCTTTGACAAGGGTGACGATGACAGCTTCGAACAGGTTCTGGAGGAA
CTGGAGGAAGCGCTGCAGAAACACCGTCAACTGGCGGATCAGGGTCGTAAGAAAGG
CCTGCTGACCAGCGAGGCGGCGAAGCAGGGTGATCAATTTGTTCAACTGTTCCAACG
TTTTCGTGAAGCGTGGGACAAGGGCGATAAAGACAGCCTGGAGCAAATCCTGGAGG
AACTGGAACAGGTGGCGCAAAAAGCGGTTGAGCTGGGCTGAAGATTCTGAAAACC
CAG
```

The expressed protein sequence was finally:

```
MHHHHHENLYFQ/SSEKEELFEKLRKQTADEAVQLFQRLREIFDKGDDDSFEQVLEELEE
ALQKHRQLADQGRKKGLLTSEAAKQGDQFVQLFQRFREAWDKGDKDSLEQILEELEV
AQKAVELGLKILKTQ
```

where the “/” defines the cleavage site of TEV protease. The plasmids were transfected into *E. coli* BL21(DE3) cells, which were grown in LB/carbenicillin media until OD @ 600 nm = 0.6. The cells were then induced with 1 mM IPTG (final concentration) and allowed to grow for 4 more hours. Cells were then centrifuged and frozen. The frozen cell pellets were lysed via sonication in 50 mM MES, 150 mM NaCl, 20 mM imidazole pH 7.5. The expressed, His-tagged MPP1 protein was purified via a Ni NTA column (Fisher) and confirmed by gel electrophoresis, with an approximate yield of 25 mg/L. MPP2-4 were expressed and purified in the same manner.

**NMR spectroscopy.** All NMR samples contained 0.2 mM protein in a 50 mM phosphate buffer at pH 7.5 and 5% D<sub>2</sub>O. 1D Spectra were recorded at 298 K on a Bruker 800 MHz spectrometer equipped with a cryogenic probe. The <sup>1</sup>H zgesgp spectra were recorded with 512 scans with 30 ppm spectral width. <sup>1</sup>H chemical shifts were referenced with respect to the residual water peak at 4.75 ppm. All spectra were processed and analyzed using the program TopSpin 3.6 (Bruker, Karlsruhe, Germany). Prior to Fourier transformation, time domain data were multiplied by sine square bell window functions shifted by 90° and zero-filled once.

**Oxidation with NaIO<sub>4</sub> and sulfoxidation of thioanisole.** To a 1 mL solution of 10 μM Mn(III)MPP1 in 50 mM MES, 150 mM NaCl pH 7.5 in a quartz cuvette, 100 μL of 100 mM NaIO<sub>4</sub> stock solution in water was added. The reaction was monitored with 30 s scans until the absorbance at 430 nm reached its maximum. Then 1 μL of a 100 mM thioanisole stock solution in DMSO was added and mixed by hand before recording spectra every 3 s. The reaction was completed after ~ 1 minute and the reaction mixture was directly injected on the mass spectrometer for analysis. Performing the control reaction with thioanisole and NaIO<sub>4</sub> showed no evidence of sulfoxidation in the mass spectrum. These reactions were also performed in buffer containing 50 mM sodium phosphate, 150 mM NaCl pH 7.5 with no observable difference as compared to the MES buffer condition.

**Equilibrium spectrochemical redox titrations.**<sup>7</sup> To a 2 mL solution of 15 μM Mn(III)MPP1 in 50 mM phosphate, 150 mM NaCl pH 7 buffer, a redox indicator dye (Indigo-5-5'-disulfonic acid, IDIS, with midpoint reduction potential at neutral pH, E<sub>m,7</sub> = -125 mV versus SHE) was added to a 28 μM concentration. The sample was then transferred to an anaerobic quartz cuvette and degassed by sequential vacuum pumping and purging with N<sub>2</sub>. The quartz chamber was fitted with a 250 μl Hamilton Gastight syringe containing degassed 2.16 mM sodium dithionite solution. After an initial spectrum collection, a 5 μl aliquot of the dithionite solution was injected with reduction occurring within the mixing time. Dithionite was added in increments of 5 μl until the Mn(III) Soret at 463 nm had converted to the Mn(II) Soret at 430 nm. The ratio of corresponding oxidized and reduced species present after each addition of dithionite was computed after spectral deconvolution of the absorbance spectra recorded in the titration. This was done by using basis spectra of the oxidized and reduced forms of the protein and indicator. The equilibrium midpoint potential of MPP1 was computed with equation (1) which uses the known midpoint potential of the redox indicator as a reference point (Fig. S13). This process was repeated with the redox indicator dye (potassium indigotrisulfonate, ITRIS, with E<sub>m,7</sub> = -81 mV vs SHE). The potential values obtained from each dye were averaged to give -107 mV vs SHE and the error (± 5 mV) was calculated from the standard deviation of the two potentials.

$$E_m^{ref} - \frac{RT}{nF} \ln \frac{[Dye_{red}]}{[Dye_{ox}]} = E_m^{Mn(III/II)} - \frac{RT}{nF} \ln \frac{[Mn^{II}]}{[Mn^{III}]} \quad (1)$$

**Equilibrium spectroelectrochemical experiments.** The spectroelectrochemical experiments were done using Honeycomb Spectroelectrochemical Cell Kit (Pine Instruments) in a quartz cuvette (1.7 mm path length) using a gold surface as working and counter electrodes and Ag/AgCl as reference electrode (values were converted to SHE for comparison). Indigo-5,5'-

disulfonic acid disodium salt (50-100  $\mu\text{M}$ ) was added as redox mediator in the protein solution ( $\sim 5\text{-}10\ \mu\text{M}$ ) in phosphate buffer (50 mM with 150 mM added NaCl). After degassing by vacuum purging with argon for at least 12 cycles, electrolysis of the solution was performed by holding the potential of the working electrode until the spectral change was complete (15-20 min). Electrolysis potential ranging from -200 mV to -600 mV vs Ag/AgCl (10 to -390 mV vs SHE) was changed by increments of 25-50 mV. Spectroelectrochemical changes of redox mediator was recorded under same electrolysis potential and the absorption for the redox mediator was subtracted from the original spectra to obtain spectra of the protein (Fig. 5). From the spectral changes at 430 nm (corresponding to Mn(II)) and 460 nm (corresponding to Mn(III)), percent conversion was calculated and plotted versus applied potential. Midpoint potential was found from the plot at 50% conversion. The same procedure was performed at pH ranging from pH 6 - pH 8; these midpoint potential values are listed in Table S2. Attempts to measure the potential at pH < 6 were complicated by possible protonation of the axial His ligand.

**Crystallization of MPP1.** A solution of holo-MPP1 was concentrated via centrifugation in an Amicon Ultra – 0.5 mL centrifuge filter (10 kDa MW cutoff) until a concentration of 60 mg/mL was reached (based on measured absorbance at 463 nm,  $\epsilon_{463} = 65,000\ \text{M}^{-1}\ \text{cm}^{-1}$ ). Crystallization conditions were screened against the Hampton Crystal HT matrix with a Mosquito Crystal instrument. Crystals were found with the following conditions: a 0.2  $\mu\text{L}$  hanging-drop (0.1  $\mu\text{L}$  holo-MPP1 and 0.1  $\mu\text{L}$  crystallization buffer (0.1 M HEPES pH 7.5, 0.8 M  $\text{NaH}_2\text{PO}_4$ , 0.8 M  $\text{KH}_2\text{PO}_4$ )). Crystals were harvested, cryo-protected in 30% glycerol in crystallization buffer for 30 seconds before being flash-frozen in liquid nitrogen.

MPP2 was screened against 3 crystallization matrices (Hampton Crystal HT, Index, and SaltRx 1 and 2) but no crystals were obtained.

**Data collection and processing.** Diffraction data was collected at SSRL Beamline 12-2 on a PILATUS 6M detector with a 1.11 Å wavelength at 100 K. Data were processed with HKL2000<sup>8</sup> and statistics for data processing and structural refinement can be found in Table S3. The structure was solved by molecular replacement with Phaser<sup>9</sup> using the MPP1 design model. Phenix was used for refinement and REEL was used for ligand manipulation. Cofactor placement was based on residual electron in the binding site along with anomalous maps phased from metal ion-free models after molecular replacement. Additional density on the surface of the bundle near E58 was found and modelled as an additional MnDPP. It sits on a C2 symmetry axis and was therefore modelled with 50% occupancy. In solution, the protein is monomeric and binds a single equivalent of MnDPP cofactor (Fig. 3B). Therefore, this is likely a crystallographic artifact. Protein model building and adjustments were performed in Coot.<sup>10</sup>

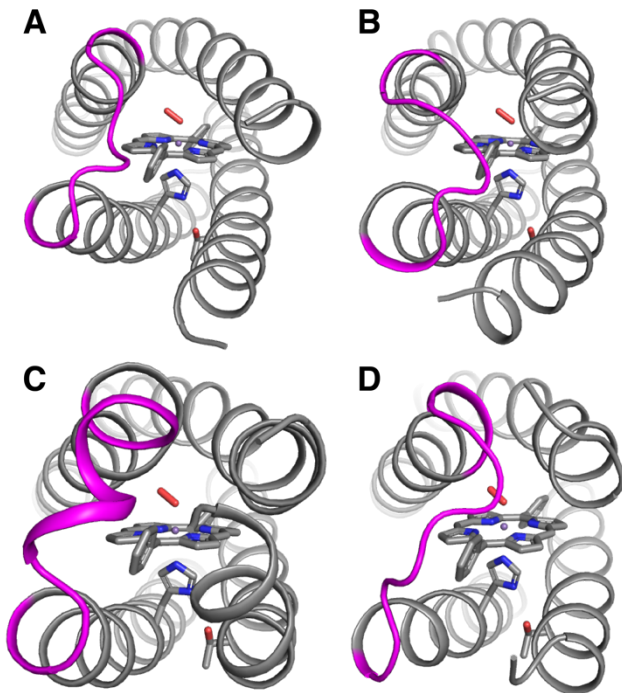

**Figure S1.** Rosetta models of MPP1 (A), MPP2 (B), MPP3 (C), and MPP4 (D) highlighting the different loops chosen (purple) using MASTER.

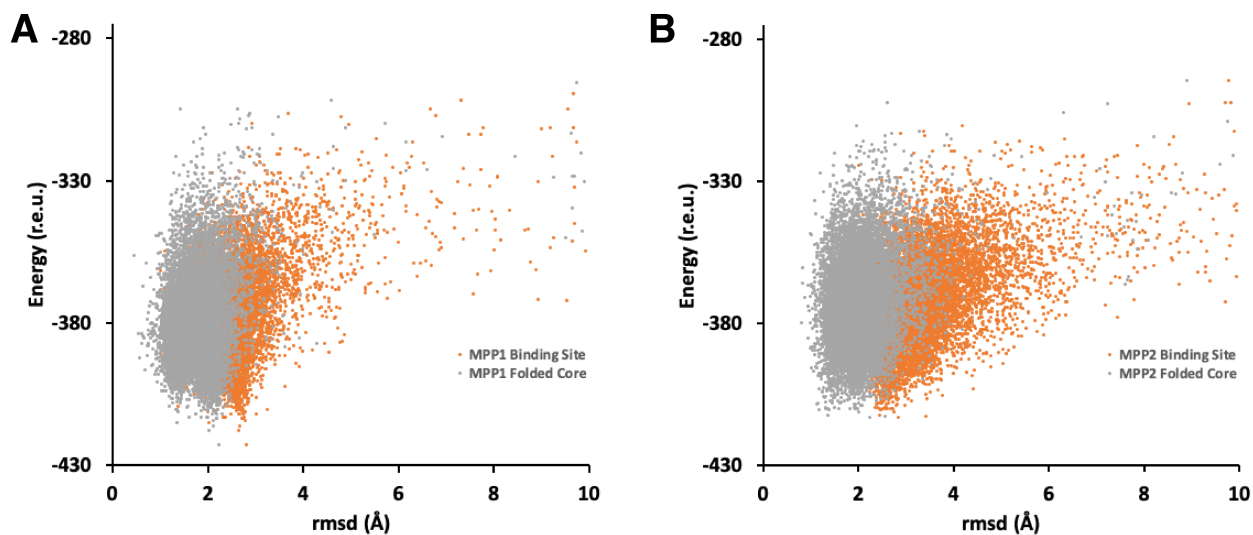

**Figure S2.** Rosetta *ab initio* folding predictions for (A) MPP1 and (B) MPP2 comparing the binding site and folded core. The folding algorithm predicts a lower RMSD for the folded core region (grey) versus the binding site region (orange) of apo-MPP1 and apo-MPP2.

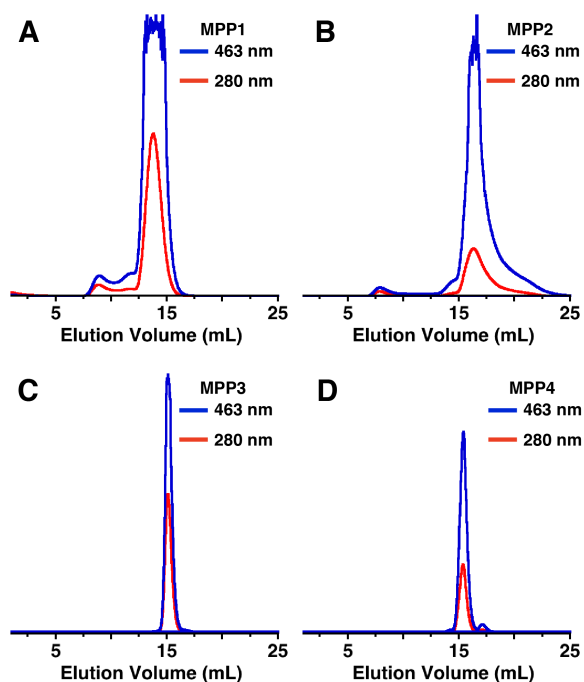

**Figure S3.** FPLC traces showing that holo-MPP1(A), holo-MPP2 (B), holo-MPP3 (C), and holo-MPP4 (D) are monomers in solution and elute with the MnDPP cofactor (based on the absorbance at 463 nm).

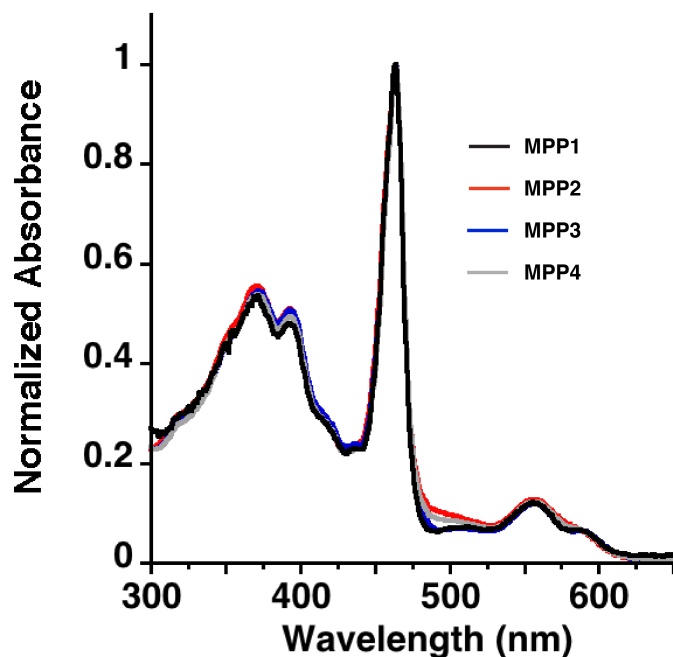

**Figure S4.** Electronic absorption spectra of holo-MPP1-4 showing identical spectral features suggesting similar binding environments for the Mn(III)DPP cofactor.



(A) MPP1

apo

holo

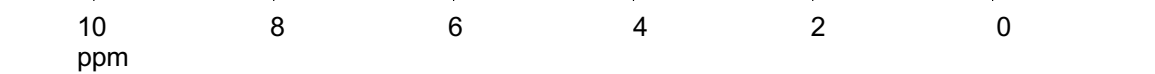

(B) MPP2

apo

holo

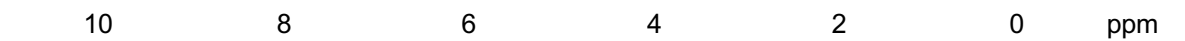

(C) MPP3

holo

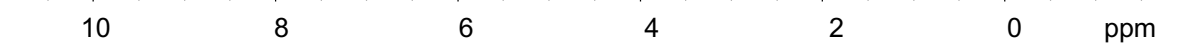

(D) MPP4

apo

holo

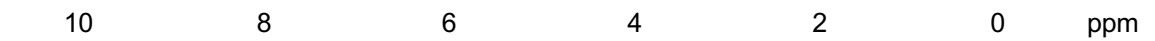

**Figure S5.** 1D NMR comparison of MPP1-4. (A) for MPP1, amide chemical shift dispersion (6.3-8.8ppm) and upfield shifted methyl chemical shifts (<0.5ppm) indicated that the apo form is already well-structured. Upon ligand binding, the amide chemical shift dispersion is further expanded, and methyl chemical shifts are more upfield shifted. The same holds true for MPP2 (B). For MPP3 (C), the holo wasn't folded well based on the broad peak linewidth which indicates its molten globule state. For MPP4 (D), the apo is well structured but the holo is in a molten globule state.

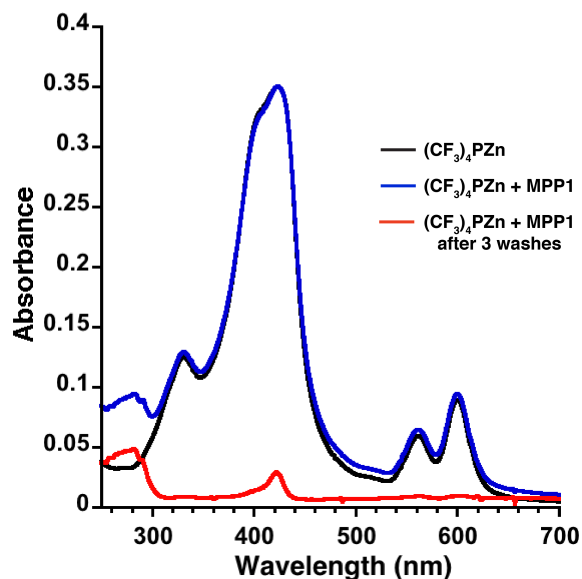

**Figure S6.** Electronic absorption spectra showing that  $(CF_3)_4PZn$  does not bind to MPP1. Buffer conditions: 50 mM MES 150 mM NaCl pH 7.5.

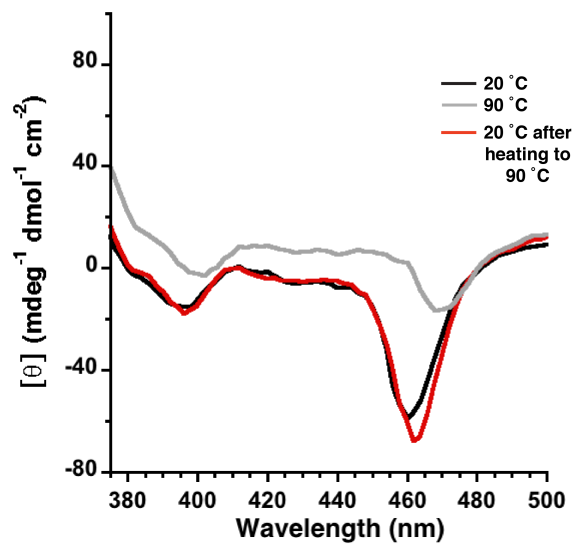

**Figure S7.** CD spectra showing that holo-MPP1 maintains its structure and MnDPP binding site after heating to 90 °C.

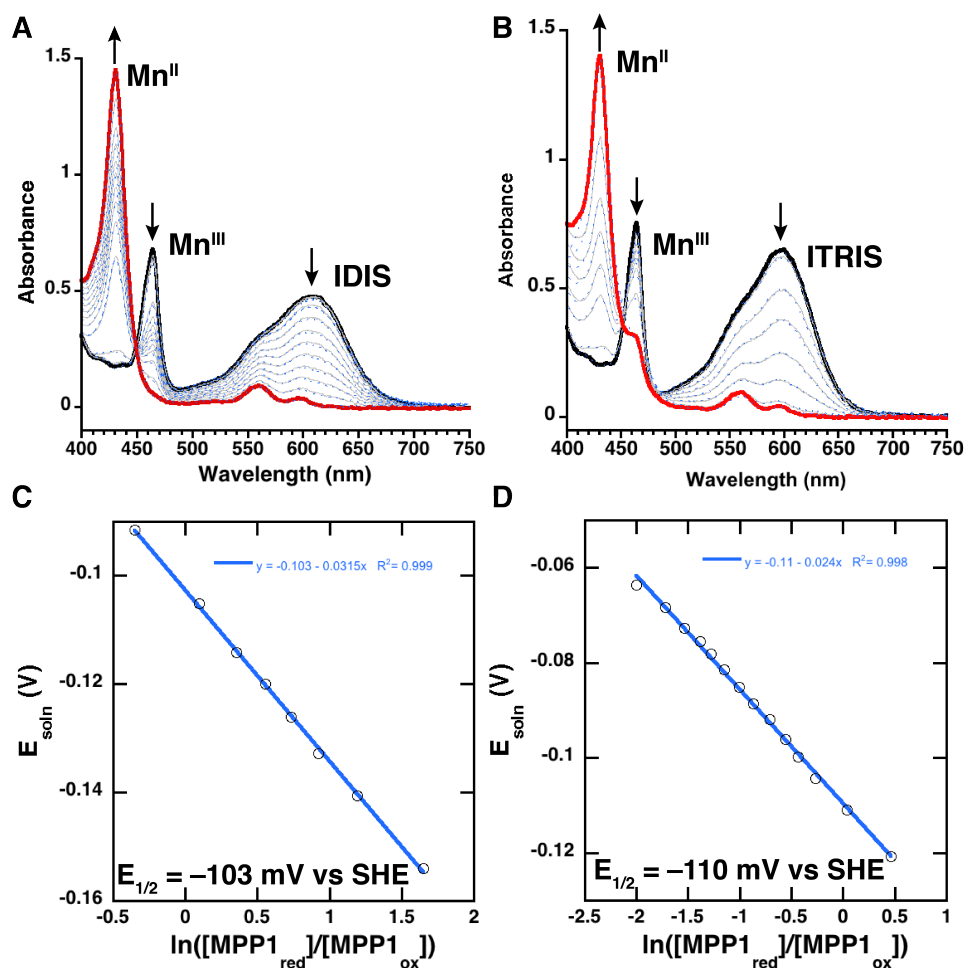

**Figure S8.** Equilibrium redox titration experiment. (A) and (B) show the electronic absorption spectra monitoring the reduction of Mn(III)MPP1 in the presence of IDRIS and ITRIS, respectively. Blue dashed line is the fit of the data. (C) and (D) show the plotted solution potentials computed from the titration data for IDRIS and ITRIS, respectively, used to estimate the equilibrium midpoint potential of holoMPP1. Both plots have slopes that are consistent with a 1 e<sup>-</sup> Nernstian process.

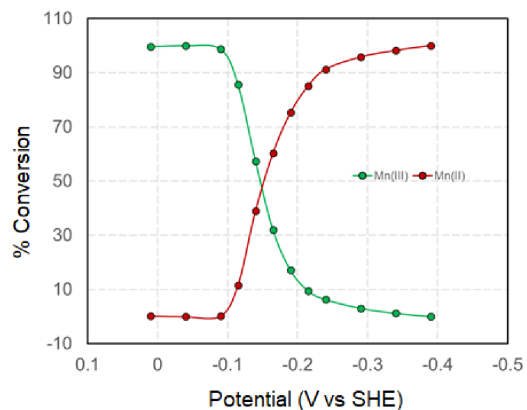

**Figure S9. (A)** Representative plot showing percent conversion from Mn(III)MPP1 to Mn(II)MPP1 during spectroelectrochemical measurements at pH 8 from 10 to -390 mV vs SHE. Mn(III)-MPP1 to Mn(II)-MPP1 conversion was based on their absorbances at 463 nm and 430 nm, respectively.

**Table S2.** Midpoint potentials from pH 6-8 measured by spectroelectrochemical titrations.

| pH  | $E_{1/2}(\text{Mn}^{\text{II/III}})$ (V vs SHE) |
|-----|-------------------------------------------------|
| 6   | -0.11                                           |
| 7   | -0.145                                          |
| 7.5 | -0.146                                          |
| 8   | -0.15                                           |

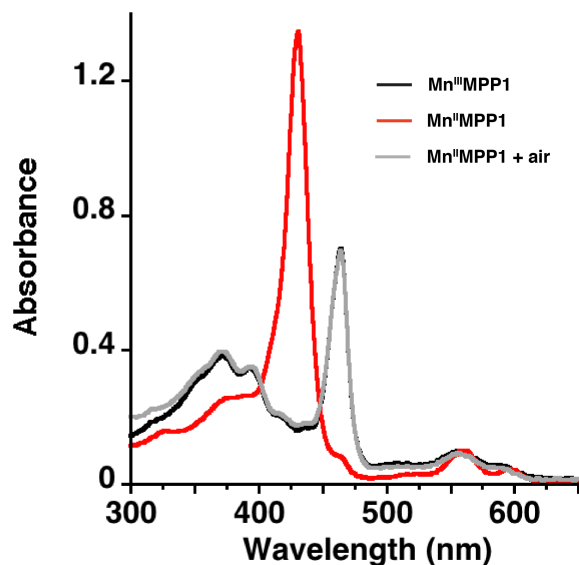

**Figure S10.** Absorption spectra of a degassed solution of Mn(III)MPP1 (black), after reduction with 1 equivalent of dithionite (red), and subsequent exposure to air (grey) showing the full recovery of the Mn(III) species.

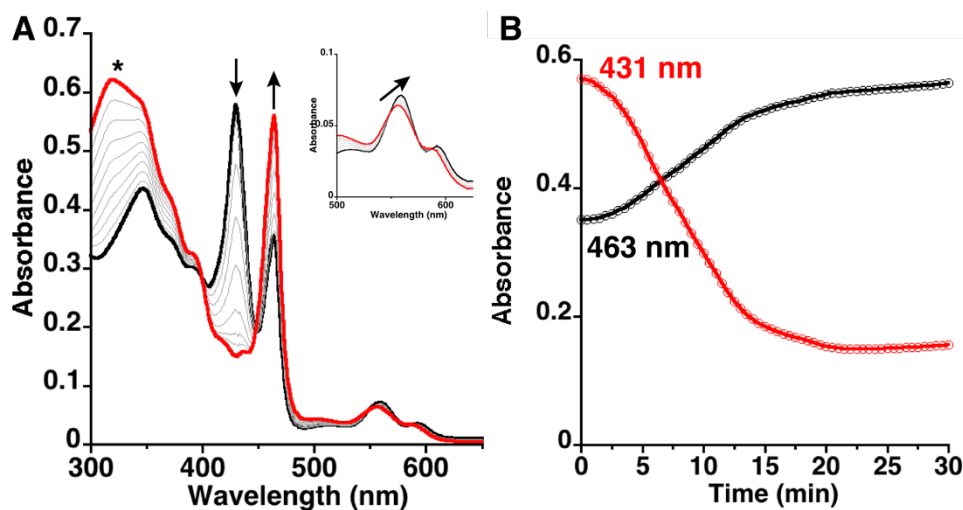

**Figure S11.** (A) Electronic absorption spectra showing the conversion of the Mn(V)-oxido species (black) back to the Mn(III)MPP1 species (red) with 30 s scans. Inset: Zoom in of changes in Q-bands. (B) Time trace of the reaction in (A). (\*) indicates the absorbance from NaIO<sub>4</sub> reduction.

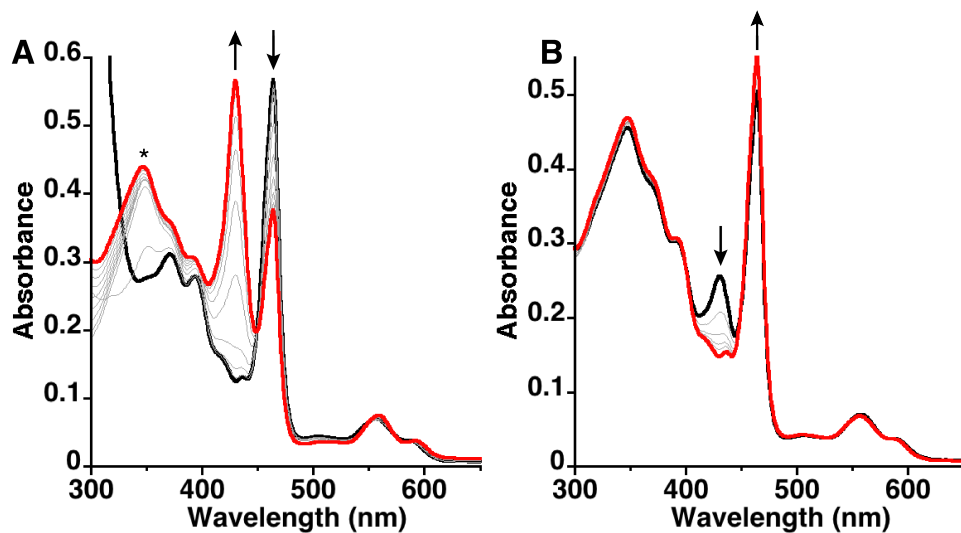

**Figure S12.** (A) Electronic absorption spectra showing the conversion of Mn(III)MPP1 (black) to the Mn(V)-oxido species (red) showing scans every 2-min. (B) Conversion of the Mn(V)-oxido species (black) to Mn(III)MPP1 (red) after addition of 10 equivalents of thioanisole. All reactions were performed in 50 mM sodium phosphate 150 mM NaCl pH 7.5.

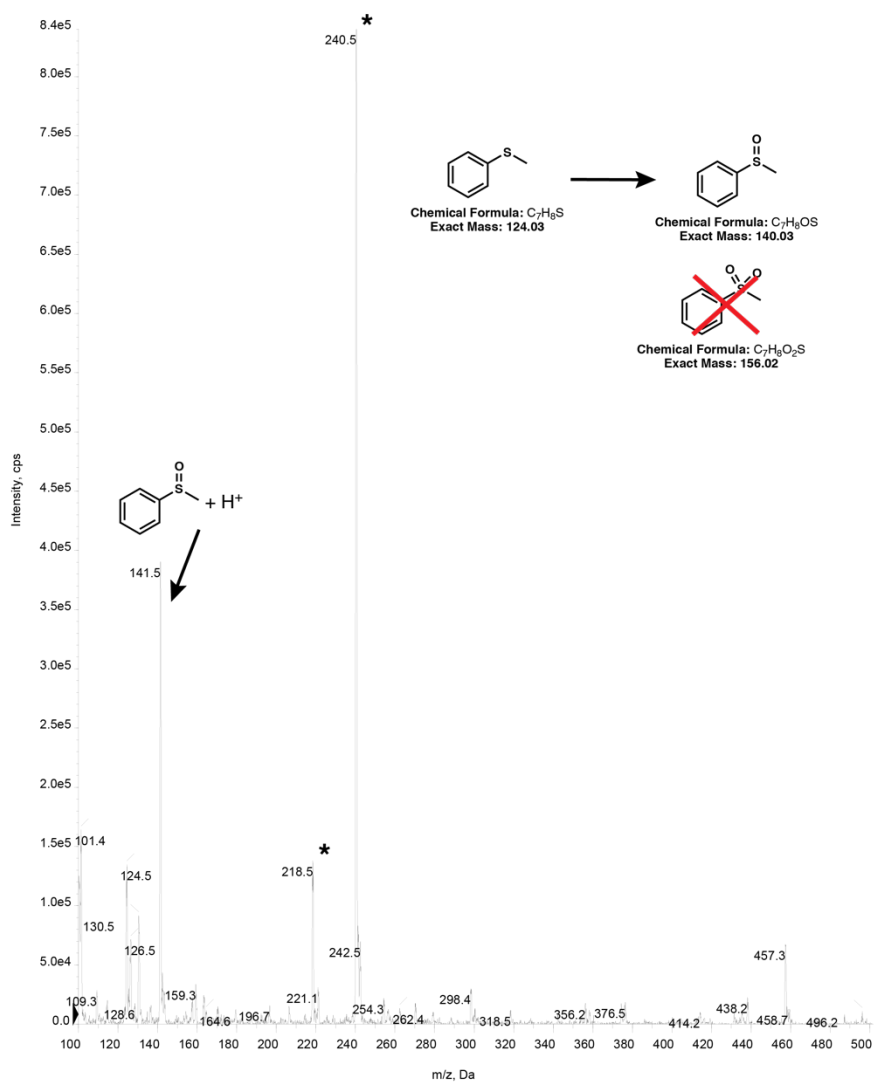

**Figure S13.** Mass spectrum of reaction mixture after addition of thioanisole to Mn(V)-oxido MPP1 showing formation of phenyl methyl sulfoxide and no evidence of phenyl methyl sulfone. (\*) indicates masses from MES buffer.



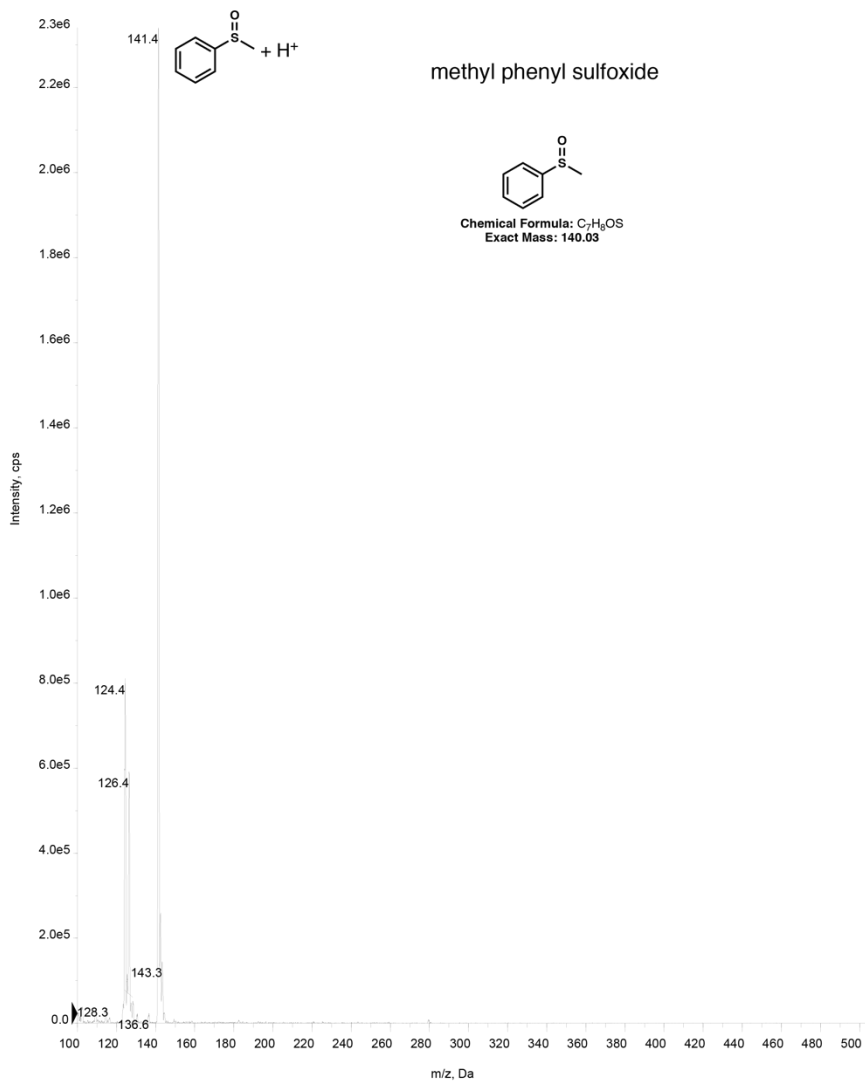

**Figure S14.** Mass spectrum of phenyl methyl sulfoxide standard.

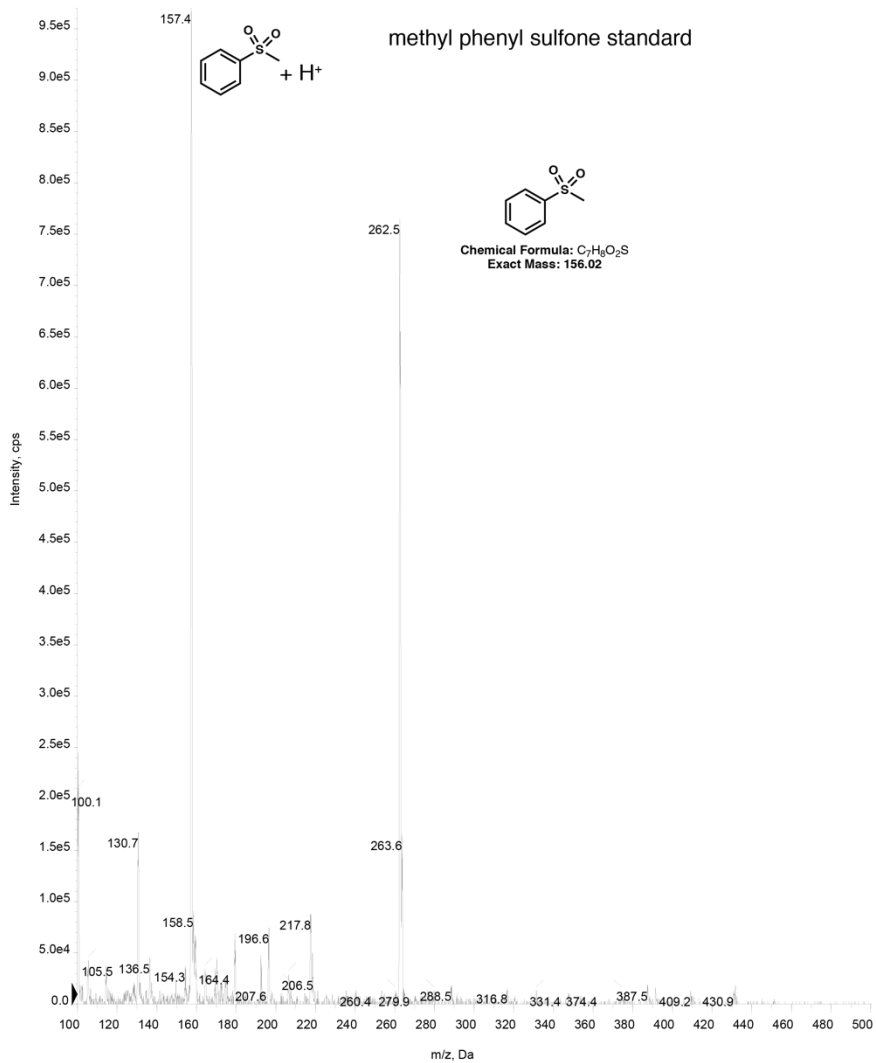

**Figure S15.** Mass spectrum of phenyl methyl sulfone standard.

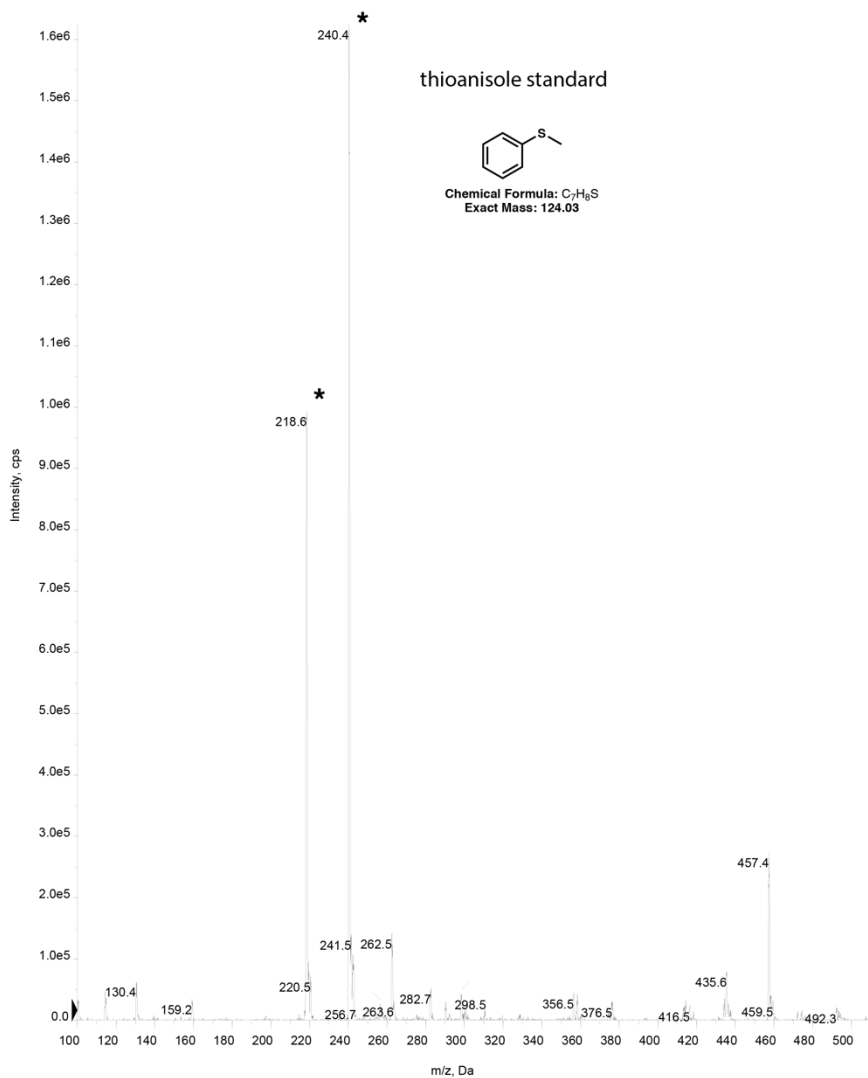

**Figure S16.** Mass spectrum of thioanisole standard. No signal corresponding to the thioanisole was observed. (\*) indicated masses from MES buffer.

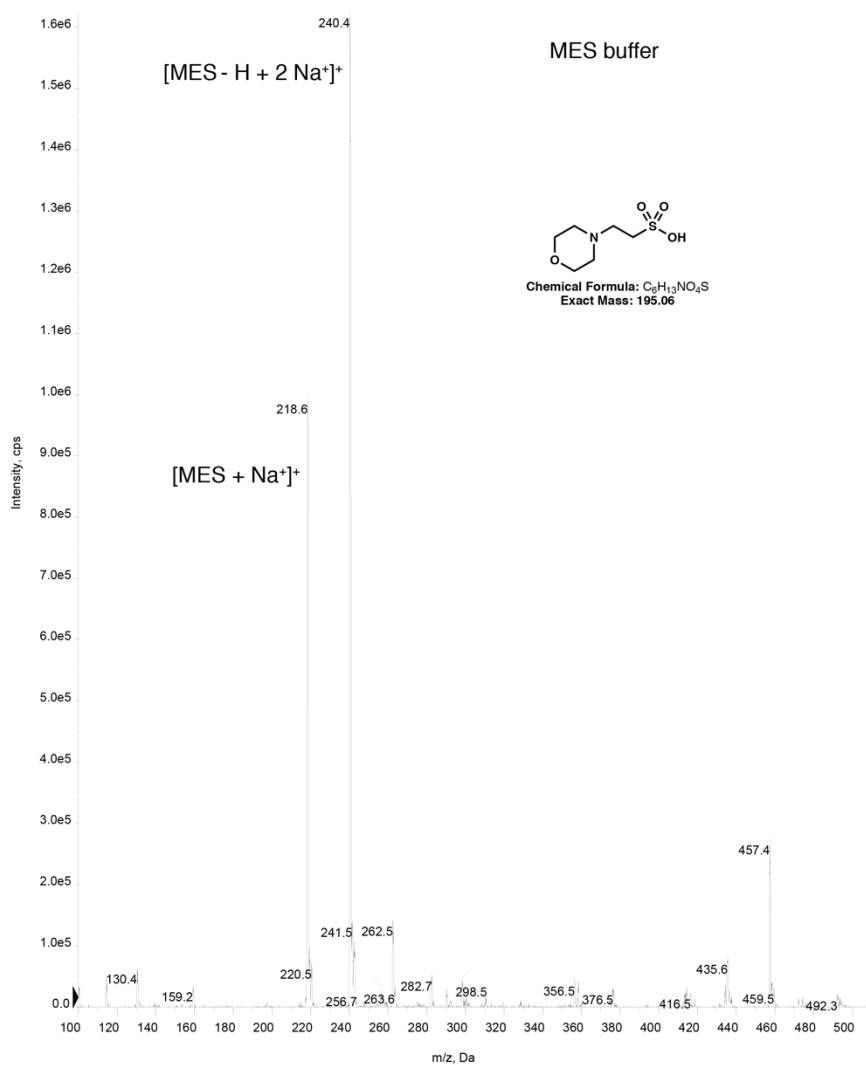

Figure S17. Mass spectrum of MES buffer solution.

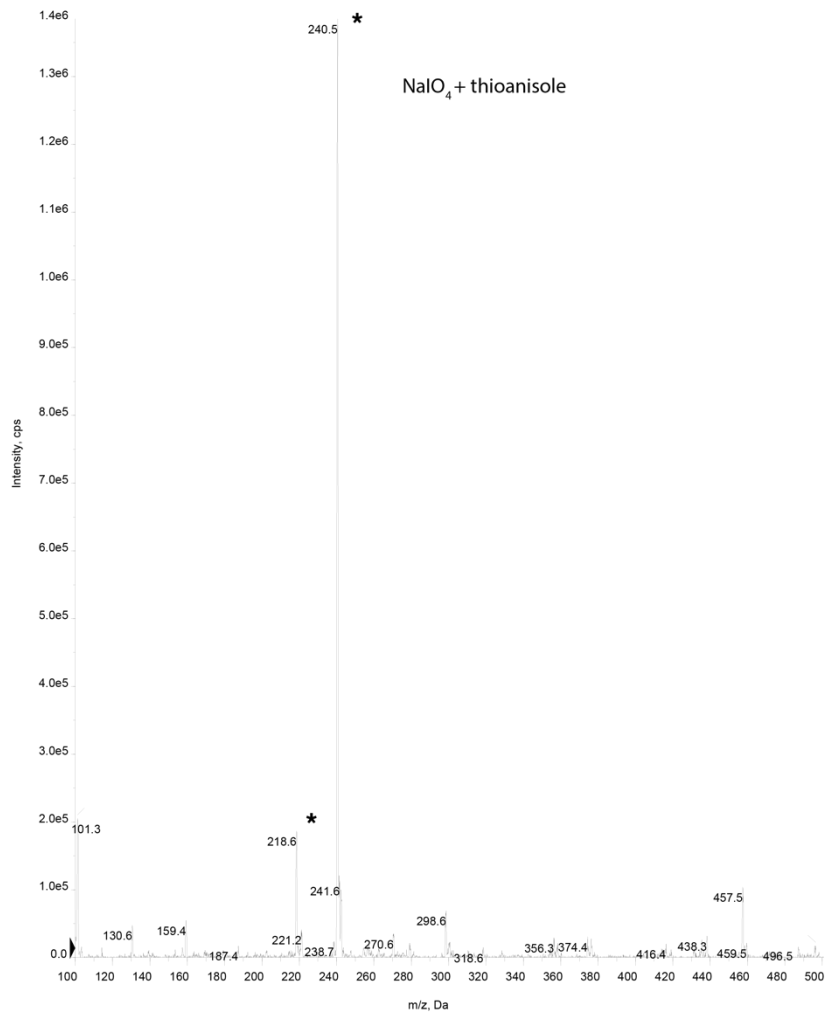

**Figure S18.** Mass spectrum of reaction mixture after incubating thioanisole and NaIO<sub>4</sub> in MES buffer. (\*) indicates masses from MES buffer.

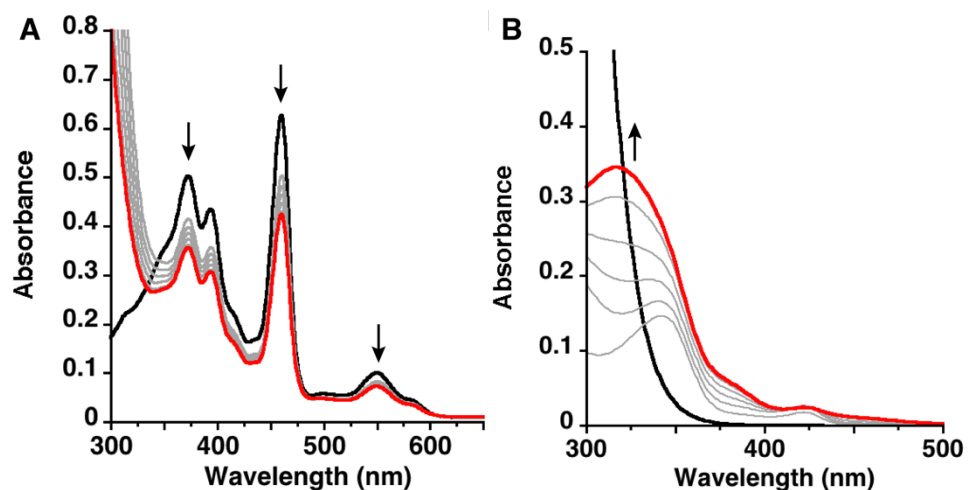

**Figure S19.** Electronic absorption spectra of reaction of Mn(III)DPP with NaIO<sub>4</sub> in buffer (A) and hydrolysis of NaIO<sub>4</sub> in buffer (B). Scan rates for (A) are 10 min. and (B) are 5 min.

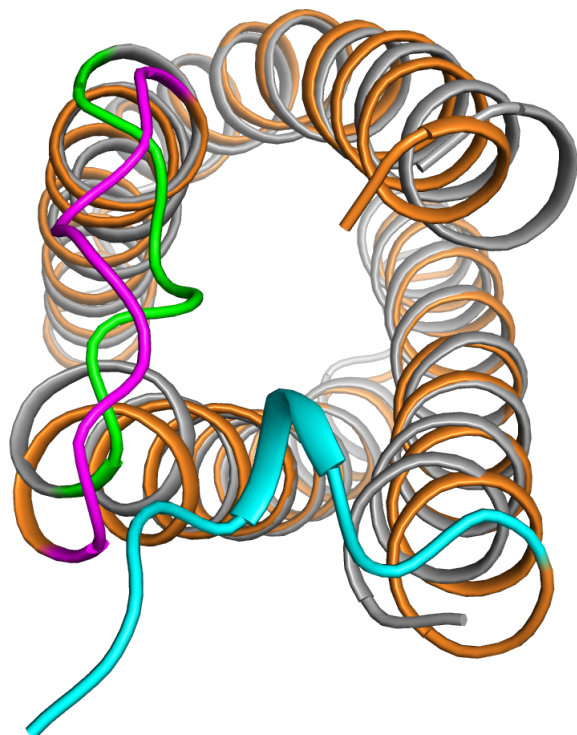

**Figure S20.** Cartoon representation of crystal structure of MPP1 (orange) aligned with the final Rosetta model of holo-MPP1 (grey) showing the displacement of loop BC (purple for structure, green for Rosetta model) by the His tag and TEV cleavage site (cyan).

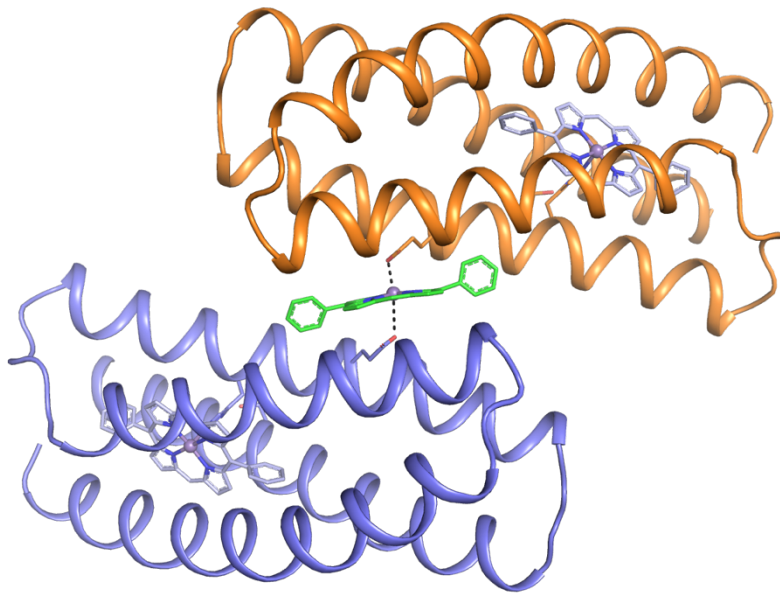

**Figure S21.** The crystal structure of holoMPP1 showing the symmetry related bundle (blue) and the secondary MnDPP (green) bound to the surface of the protein at a symmetry interface. Glu58 from symmetry-related subunits serve as axial ligands. Together, the Mn and non-functionalized meso-carbons lie along a C<sub>2</sub> axis of the crystal. The inter-subunit MnDPP refines to 0.5 occupancy, as expected for a molecule that is shared between two crystallographically identical subunits. The protein was crystallized with a 1.2-fold excess of the porphyrin, which likely explains the interfacial porphyrin. If 40% of the protein-porphyrin complex (in a 1:1 ratio) crystallized together with the 0.2-fold excess of porphyrin from the mother liquor this would account for the observed 1.5-fold excess in the crystal.

**Table S3.** Crystallographic data processing and refinement statistics.

|                              |                                                                       |
|------------------------------|-----------------------------------------------------------------------|
| Design Name                  | MPP1                                                                  |
| Cofactor                     | Mn(III)DPP                                                            |
| PDB Code                     | 7JRQ                                                                  |
| Ligand 3-letter code         | SM0                                                                   |
| <b>Data Processing</b>       |                                                                       |
| Unit Cell                    | a,b,c = 45.322 Å, 45.322 Å, 164.22 Å;<br>$\alpha, \beta, \gamma = 90$ |
| Space Group                  | P4 <sub>1</sub> 2 <sub>1</sub> 2                                      |
| Resolution (Å)               | 39.68 – 1.75                                                          |
| Highest Resolution Shell (Å) | 1.75 – 1.80                                                           |
| No. of Unique Reflection     | 18042 (1510)                                                          |
| Multiplicity                 | 8.7 (3.5)                                                             |
| I/ $\sigma$ (I)              | 5.2 (3.1)                                                             |
| R <sub>merge</sub>           | 0.089 (2.4)                                                           |
| Completeness                 | 99.4 (95.5)                                                           |
| CC(1/2)                      | 0.977 (0.483)                                                         |
| SSRL BL                      | 12-2                                                                  |
| <b>Structure Refinement</b>  |                                                                       |
| R <sub>work</sub>            | 0.195                                                                 |
| R <sub>free</sub>            | 0.2295                                                                |
| RMSD Bond Length (Å)         | 0.008                                                                 |
| RMSD Bond Angle (°)          | 0.7                                                                   |

**Command lines, RosettaScript, and flags for flexible backbone sequence design protocol.****RosettaScript (rosettascript.xml).**

```

<ROSETTASCRIPTS>
  <SCOREFXNS>
    <ScoreFunction name="cstscore" weights="ref2015">
      <Reweight scoretype="aa_composition" weight="1.0"/>
      <Reweight scoretype="atom_pair_constraint" weight="1"/>
      <Reweight scoretype="angle_constraint" weight="1"/>
      <Reweight scoretype="dihedral_constraint" weight="1"/>
    </ScoreFunction>
    <ScoreFunction name="cstscore_soft" weights="ref2015">
      <Reweight scoretype="aa_composition" weight="1.0"/>
      <Reweight scoretype="atom_pair_constraint" weight="1"/>
      <Reweight scoretype="angle_constraint" weight="1"/>
      <Reweight scoretype="dihedral_constraint" weight="1"/>
  </SCOREFXNS>
</ROSETTASCRIPTS>

```



```

        <Reweight scoretype="fa_rep" weight="0.2"/>
    </ScoreFunction>
    <ScoreFunction name="score" weights="ref2015"/>
</SCOREFXNS>
<TASKOPERATIONS>
    <ReadResfile name="rr_ex" filename="resfile_ex1.txt"/>
    <ReadResfile name="rr_aro" filename="resfile_aro.txt"/>
    <ReadResfile name="rr_ex_3" filename="resfile_ex3.txt"/>
    <InitializeFromCommandline name="ifcl" />
</TASKOPERATIONS>
<FILTERS>
    <PackStat name="pstat_mc" threshold="0.48" repeats="10"/>
    <PackStat name="pstat_stop" threshold="0.65" repeats="10"/>
    <PackStat name="pstat" repeats="10" confidence="0"/>
</FILTERS>
<MOVERS>
    <ConstraintSetMover name="csts" add_constraints="1" cst_file="constraints.cst"/>
    <PackRotamersMover name="fixbb_aro" scorefxn="cstscore_soft"
task_operations="rr_aro,ifcl"/>
    <PackRotamersMover name="fixbb_ex_1" scorefxn="cstscore" task_operations="rr_ex,ifcl"/>
    <PackRotamersMover name="fixbb_ex_3" scorefxn="cstscore" task_operations="rr_ex_3,ifcl"/>
    <MinMover name="min_bb" scorefxn="cstscore" tolerance="0.000001" max_iter="10000"
chi="0" bb="1"/>
    <MinMover name="min_sc" scorefxn="cstscore" tolerance="0.000001" max_iter="10000"
chi="1" bb="0"/>
    <FastRelax name="fr" scorefxn="cstscore" relaxscript="rosettacon2018" />
    <ParsedProtocol name="custom_flex">
        <Add mover_name="fixbb_ex_1"/>
        <Add mover_name="fr"/>
    </ParsedProtocol>
    <ParsedProtocol name="final_flex">
        <Add mover_name="fixbb_ex_3"/>
        <Add mover_name="fr"/>
    </ParsedProtocol>
    <GenericMonteCarlo name="iterate" mover_name="custom_flex"
        filter_name="pstat_mc" trials="3" preapply="0"
        temperature="0" sample_type="high"
stopping_condition="pstat_stop"
        saved_accept_file_name="last_accepted.pdb"
recover_low="1"/>
    <GenericMonteCarlo name="final" mover_name="final_flex"
        filter_name="pstat_mc" trials="1" preapply="0"
        temperature="0" sample_type="high"
        saved_accept_file_name="last_accepted.pdb"
recover_low="1"/>
</MOVERS>
<APPLY_TO_POSE>
</APPLY_TO_POSE>
<PROTOCOLS>
    <Add mover_name="csts"/>
    <Add mover_name="fixbb_aro"/>
    <Add mover_name="min_sc"/>
    <Add mover_name="min_bb"/>
    <Add mover_name="iterate"/>
    <Add mover_name="final"/>
    <Add filter_name="pstat"/>

```

```
</PROTOCOLS>
<OUTPUT scorefxn="cstscore"/>
</ROSETTASCRIPTS>
```

### Contents of Constraint File (constraints.cst).

```
#His MnDPP Bond
AtomPair NE2 50A MN1 1X HARMONIC 2.1 0.1
Angle MN1 1X NE2 50A ND1 50A CIRCULARHARMONIC 2.687 .2
Angle MN1 1X NE2 50A CG 50A CIRCULARHARMONIC 2.426 .2

#Thr His Hbond
AtomPair ND1 50A OG1 13A HARMONIC 2.8 0.1
Angle OG1 13A ND1 50A CE1 50A CIRCULARHARMONIC 2.370 .2
Angle OG1 13A ND1 50A CG 50A CIRCULARHARMONIC 2.007 .2
```

### Flags (options.txt).

```
-nstruct 100
-out:path:pdb output
-out:path:score output
-extra_res_fa MDP.params
-s input_model.pdb
```

### Command line inputs.

```
~/rosetta_bin_linux_2018.33.60351_bundle/main/source/bin/rosetta_scripts.static.linuxgccreleas
e -database ~/rosetta_bin_linux_2018.33.60351_bundle/main/database/ -parser:protocol
RosettaScript.xml @options.txt
```

### Contents of residue file (resfile\_aro.txt).

```
NATRO
ALLAAxc
NOTAA MCT
USE_INPUT_SC
start
```

```
1 A PIKAA ASTG EX ARO 1 LEVEL 3 EX ARO 2 LEVEL 3
2 A ALLAAxc NOTAA MC EX ARO 1 LEVEL 3 EX ARO 2 LEVEL 3
3 A ALLAAxc NOTAA MC EX ARO 1 LEVEL 3 EX ARO 2 LEVEL 3
4 A ALLAAxc NOTAA MC EX ARO 1 LEVEL 3 EX ARO 2 LEVEL 3
5 A ALLAAxc NOTAA MC EX ARO 1 LEVEL 3 EX ARO 2 LEVEL 3
6 A APOLAR NOTAA MCT EX ARO 1 LEVEL 3 EX ARO 2 LEVEL 3
7 A APOLAR NOTAA MCT EX ARO 1 LEVEL 3 EX ARO 2 LEVEL 3
11 A ALLAAxc NOTAA MC EX ARO 1 LEVEL 3 EX ARO 2 LEVEL 3
13 A PIKAA T
14 A APOLAR PIKAA A EX ARO 1 LEVEL 3 EX ARO 2 LEVEL 3
17 A APOLAR NOTAA MCT EX ARO 1 LEVEL 3 EX ARO 2 LEVEL 3
18 A APOLAR PIKAA ATV EX ARO 1 LEVEL 3 EX ARO 2 LEVEL 3
20 A APOLAR NOTAA MCT EX ARO 1 LEVEL 3 EX ARO 2 LEVEL 3
21 A APOLAR NOTAA MCT EX ARO 1 LEVEL 3 EX ARO 2 LEVEL 3
24 A APOLAR NOTAA MCT EX ARO 1 LEVEL 3 EX ARO 2 LEVEL 3
27 A APOLAR NOTAA MCT EX ARO 1 LEVEL 3 EX ARO 2 LEVEL 3
28 A APOLAR NOTAA MCT EX ARO 1 LEVEL 3 EX ARO 2 LEVEL 3
```

31 A PIKAA G EX ARO 1 LEVEL 3 EX ARO 2 LEVEL 3  
32 A PIKAA D EX ARO 1 LEVEL 3 EX ARO 2 LEVEL 3

36 A APOLAR NOTAA MCT EX ARO 1 LEVEL 3 EX ARO 2 LEVEL 3  
39 A APOLAR NOTAA MCT EX ARO 1 LEVEL 3 EX ARO 2 LEVEL 3  
40 A APOLAR NOTAA MCT EX ARO 1 LEVEL 3 EX ARO 2 LEVEL 3  
43 A APOLAR NOTAA MCT EX ARO 1 LEVEL 3 EX ARO 2 LEVEL 3  
46 A APOLAR NOTAA MCT EX ARO 1 LEVEL 3 EX ARO 2 LEVEL 3  
47 A APOLAR NOTAA MCT EX ARO 1 LEVEL 3 EX ARO 2 LEVEL 3  
50 A PIKAA H  
53 A APOLAR NOTAA MCT EX ARO 1 LEVEL 3 EX ARO 2 LEVEL 3  
54 A APOLAR NOTAA MCT EX ARO 1 LEVEL 3 EX ARO 2 LEVEL 3  
55 A PIKAA ED EX ARO 1 LEVEL 3 EX ARO 2 LEVEL 3  
56 A PIKAA QN EX ARO 1 LEVEL 3 EX ARO 2 LEVEL 3

57 A PIKAA G EX ARO 1 LEVEL 3 EX ARO 2 LEVEL 3

58 A ALLAAxc NOTAA M EX ARO 1 LEVEL 3 EX ARO 2 LEVEL 3  
59 A ALLAAxc NOTAA M EX ARO 1 LEVEL 3 EX ARO 2 LEVEL 3  
60 A ALLAAxc NOTAA M EX ARO 1 LEVEL 3 EX ARO 2 LEVEL 3  
61 A PIKAA G NOTAA M EX ARO 1 LEVEL 3 EX ARO 2 LEVEL 3  
62 A ALLAAxc NOTAA MWFY EX ARO 1 LEVEL 3 EX ARO 2 LEVEL 3  
63 A PIKAA LIVA EX ARO 1 LEVEL 3 EX ARO 2 LEVEL 3  
64 A PIKAA STP EX ARO 1 LEVEL 3 EX ARO 2 LEVEL 3

65 A PIKAA AST EX ARO 1 LEVEL 3 EX ARO 2 LEVEL 3  
66 A PIKAA ED EX ARO 1 LEVEL 3 EX ARO 2 LEVEL 3  
67 A APOLAR NOTAA MCT EX ARO 1 LEVEL 3 EX ARO 2 LEVEL 3  
68 A PIKAA A EX ARO 1 LEVEL 3 EX ARO 2 LEVEL 3  
69 A PIKAA K EX ARO 1 LEVEL 3 EX ARO 2 LEVEL 3  
70 A PIKAA QN EX ARO 1 LEVEL 3 EX ARO 2 LEVEL 3  
71 A PIKAA G EX ARO 1 LEVEL 3 EX ARO 2 LEVEL 3  
74 A APOLAR NOTAA MCT EX ARO 1 LEVEL 3 EX ARO 2 LEVEL 3  
78 A APOLAR NOTAA MCT EX ARO 1 LEVEL 3 EX ARO 2 LEVEL 3  
81 A APOLAR NOTAA MCT EX ARO 1 LEVEL 3 EX ARO 2 LEVEL 3  
84 A APOLAR NOTAA MCT EX ARO 1 LEVEL 3 EX ARO 2 LEVEL 3  
85 A APOLAR NOTAA MCT EX ARO 1 LEVEL 3 EX ARO 2 LEVEL 3

88 A PIKAA G EX ARO 1 LEVEL 3 EX ARO 2 LEVEL 3  
89 A PIKAA D EX ARO 1 LEVEL 3 EX ARO 2 LEVEL 3

93 A APOLAR NOTAA MCT EX ARO 1 LEVEL 3 EX ARO 2 LEVEL 3  
96 A APOLAR NOTAA MCT EX ARO 1 LEVEL 3 EX ARO 2 LEVEL 3  
97 A APOLAR NOTAA MCT EX ARO 1 LEVEL 3 EX ARO 2 LEVEL 3  
100 A APOLAR NOTAA MCT EX ARO 1 LEVEL 3 EX ARO 2 LEVEL 3  
103 A APOLAR NOTAA MCT EX ARO 1 LEVEL 3 EX ARO 2 LEVEL 3  
104 A APOLAR NOTAA MCT EX ARO 1 LEVEL 3 EX ARO 2 LEVEL 3  
107 A APOLAR NOTAA MCT EX ARO 1 LEVEL 3 EX ARO 2 LEVEL 3  
108 A PIKAA VLT EX ARO 1 LEVEL 3 EX ARO 2 LEVEL 3  
111 A PIKAA G EX ARO 1 LEVEL 3 EX ARO 2 LEVEL 3  
112 A APOLAR NOTAA MC EX ARO 1 LEVEL 3 EX ARO 2 LEVEL 3  
113 A ALLAAxc NOTAA MCH EX ARO 1 LEVEL 3 EX ARO 2 LEVEL 3  
114 A APOLAR NOTAA MCW EX ARO 1 LEVEL 3 EX ARO 2 LEVEL 3  
115 A APOLAR NOTAA MC EX ARO 1 LEVEL 3 EX ARO 2 LEVEL 3  
116 A ALLAAxc NOTAA MCH EX ARO 1 LEVEL 3 EX ARO 2 LEVEL 3

117 A ALLAAxc NOTAA MCH EX ARO 1 LEVEL 3 EX ARO 2 LEVEL 3  
118 A POLAR NOTAA MCH EX ARO 1 LEVEL 3 EX ARO 2 LEVEL 3

**Contents of residue file (resfile\_ex1.txt).**

NATRO  
ALLAAxc  
NOTAA MCT  
USE\_INPUT\_SC  
start

1 A PIKAA ASTG EX 1 LEVEL 1 EX 2 LEVEL 1  
2 A ALLAAxc NOTAA MC EX 1 LEVEL 1 EX 2 LEVEL 1  
3 A ALLAAxc NOTAA MC EX 1 LEVEL 1 EX 2 LEVEL 1  
4 A ALLAAxc NOTAA MC EX 1 LEVEL 1 EX 2 LEVEL 1  
5 A ALLAAxc NOTAA MC EX 1 LEVEL 1 EX 2 LEVEL 1  
6 A APOLAR NOTAA MCT EX 1 LEVEL 1 EX 2 LEVEL 1  
7 A APOLAR NOTAA MCT EX 1 LEVEL 1 EX 2 LEVEL 1  
11 A ALLAAxc NOTAA MC EX 1 LEVEL 1 EX 2 LEVEL 1  
13 A PIKAA T  
14 A APOLAR PIKAA A EX 1 LEVEL 1 EX 2 LEVEL 1  
17 A APOLAR NOTAA MCT EX 1 LEVEL 1 EX 2 LEVEL 1  
18 A APOLAR PIKAA ATV EX 1 LEVEL 1 EX 2 LEVEL 1  
20 A APOLAR NOTAA MCT EX 1 LEVEL 1 EX 2 LEVEL 1  
21 A APOLAR NOTAA MCT EX 1 LEVEL 1 EX 2 LEVEL 1  
24 A APOLAR NOTAA MCT EX 1 LEVEL 1 EX 2 LEVEL 1  
27 A APOLAR NOTAA MCT EX 1 LEVEL 1 EX 2 LEVEL 1  
28 A APOLAR NOTAA MCT EX 1 LEVEL 1 EX 2 LEVEL 1  
  
31 A PIKAA G EX 1 LEVEL 1 EX 2 LEVEL 1  
32 A PIKAA D EX 1 LEVEL 1 EX 2 LEVEL 1  
  
36 A APOLAR NOTAA MCT EX 1 LEVEL 1 EX 2 LEVEL 1  
39 A APOLAR NOTAA MCT EX 1 LEVEL 1 EX 2 LEVEL 1  
40 A APOLAR NOTAA MCT EX 1 LEVEL 1 EX 2 LEVEL 1  
43 A APOLAR NOTAA MCT EX 1 LEVEL 1 EX 2 LEVEL 1  
46 A APOLAR NOTAA MCT EX 1 LEVEL 1 EX 2 LEVEL 1  
47 A APOLAR NOTAA MCT EX 1 LEVEL 1 EX 2 LEVEL 1  
50 A PIKAA H  
53 A APOLAR NOTAA MCT EX 1 LEVEL 1 EX 2 LEVEL 1  
54 A APOLAR NOTAA MCT EX 1 LEVEL 1 EX 2 LEVEL 1  
55 A PIKAA ED EX 1 LEVEL 1 EX 2 LEVEL 1  
56 A PIKAA QN EX 1 LEVEL 1 EX 2 LEVEL 1  
  
57 A PIKAA G EX 1 LEVEL 1 EX 2 LEVEL 1  
  
58 A ALLAAxc NOTAA M EX 1 LEVEL 1 EX 2 LEVEL 1  
59 A ALLAAxc NOTAA M EX 1 LEVEL 1 EX 2 LEVEL 1  
60 A ALLAAxc NOTAA M EX 1 LEVEL 1 EX 2 LEVEL 1  
61 A PIKAA G NOTAA M EX 1 LEVEL 1 EX 2 LEVEL 1  
62 A ALLAAxc NOTAA MWFY EX 1 LEVEL 1 EX 2 LEVEL 1  
63 A PIKAA LIVA EX 1 LEVEL 1 EX 2 LEVEL 1  
64 A PIKAA STP EX 1 LEVEL 1 EX 2 LEVEL 1  
  
65 A PIKAA AST EX 1 LEVEL 1 EX 2 LEVEL 1  
66 A PIKAA ED EX 1 LEVEL 1 EX 2 LEVEL 1  
67 A APOLAR NOTAA MCT EX 1 LEVEL 1 EX 2 LEVEL 1

68 A PIKAA A EX 1 LEVEL 1 EX 2 LEVEL 1  
69 A PIKAA K EX 1 LEVEL 1 EX 2 LEVEL 1  
70 A PIKAA QN EX 1 LEVEL 1 EX 2 LEVEL 1  
71 A PIKAA G EX 1 LEVEL 1 EX 2 LEVEL 1  
74 A APOLAR NOTAA MCT EX 1 LEVEL 1 EX 2 LEVEL 1  
78 A APOLAR NOTAA MCT EX 1 LEVEL 1 EX 2 LEVEL 1  
81 A APOLAR NOTAA MCT EX 1 LEVEL 1 EX 2 LEVEL 1  
84 A APOLAR NOTAA MCT EX 1 LEVEL 1 EX 2 LEVEL 1  
85 A APOLAR NOTAA MCT EX 1 LEVEL 1 EX 2 LEVEL 1

88 A PIKAA G EX 1 LEVEL 1 EX 2 LEVEL 1  
89 A PIKAA D EX 1 LEVEL 1 EX 2 LEVEL 1

93 A APOLAR NOTAA MCT EX 1 LEVEL 1 EX 2 LEVEL 1  
96 A APOLAR NOTAA MCT EX 1 LEVEL 1 EX 2 LEVEL 1  
97 A APOLAR NOTAA MCT EX 1 LEVEL 1 EX 2 LEVEL 1  
100 A APOLAR NOTAA MCT EX 1 LEVEL 1 EX 2 LEVEL 1  
103 A APOLAR NOTAA MCT EX 1 LEVEL 1 EX 2 LEVEL 1  
104 A APOLAR NOTAA MCT EX 1 LEVEL 1 EX 2 LEVEL 1  
107 A APOLAR NOTAA MCT EX 1 LEVEL 1 EX 2 LEVEL 1  
108 A PIKAA VLT EX 1 LEVEL 1 EX 2 LEVEL 1  
111 A PIKAA G EX 1 LEVEL 1 EX 2 LEVEL 1  
112 A APOLAR NOTAA MC EX 1 LEVEL 1 EX 2 LEVEL 1  
113 A ALLAAxc NOTAA MCH EX 1 LEVEL 1 EX 2 LEVEL 1  
114 A APOLAR NOTAA MCW EX 1 LEVEL 1 EX 2 LEVEL 1  
115 A APOLAR NOTAA MC EX 1 LEVEL 1 EX 2 LEVEL 1  
116 A ALLAAxc NOTAA MCH EX 1 LEVEL 1 EX 2 LEVEL 1  
117 A ALLAAxc NOTAA MCH EX 1 LEVEL 1 EX 2 LEVEL 1  
118 A POLAR NOTAA MCH EX 1 LEVEL 1 EX 2 LEVEL 1

### **Contents of residue file (resfile\_ex3.txt).**

NATRO  
ALLAAxc  
NOTAA MCT  
USE\_INPUT\_SC  
start

1 A PIKAA ASTG EX 1 LEVEL 3 EX 2 LEVEL 3  
2 A ALLAAxc NOTAA MC EX 1 LEVEL 3 EX 2 LEVEL 3  
3 A ALLAAxc NOTAA MC EX 1 LEVEL 3 EX 2 LEVEL 3  
4 A ALLAAxc NOTAA MC EX 1 LEVEL 3 EX 2 LEVEL 3  
5 A ALLAAxc NOTAA MC EX 1 LEVEL 3 EX 2 LEVEL 3  
6 A APOLAR NOTAA MCT EX 1 LEVEL 3 EX 2 LEVEL 3  
7 A APOLAR NOTAA MCT EX 1 LEVEL 3 EX 2 LEVEL 3  
11 A ALLAAxc NOTAA MC EX 1 LEVEL 3 EX 2 LEVEL 3  
13 A PIKAA T  
14 A APOLAR PIKAA A EX 1 LEVEL 3 EX 2 LEVEL 3  
17 A APOLAR NOTAA MCT EX 1 LEVEL 3 EX 2 LEVEL 3  
18 A APOLAR PIKAA ATV EX 1 LEVEL 3 EX 2 LEVEL 3  
20 A APOLAR NOTAA MCT EX 1 LEVEL 3 EX 2 LEVEL 3  
21 A APOLAR NOTAA MCT EX 1 LEVEL 3 EX 2 LEVEL 3  
24 A APOLAR NOTAA MCT EX 1 LEVEL 3 EX 2 LEVEL 3  
27 A APOLAR NOTAA MCT EX 1 LEVEL 3 EX 2 LEVEL 3  
28 A APOLAR NOTAA MCT EX 1 LEVEL 3 EX 2 LEVEL 3

31 A PIKAA G EX 1 LEVEL 3 EX 2 LEVEL 3

32 A PIKAA D EX 1 LEVEL 3 EX 2 LEVEL 3

36 A APOLAR NOTAA MCT EX 1 LEVEL 3 EX 2 LEVEL 3  
39 A APOLAR NOTAA MCT EX 1 LEVEL 3 EX 2 LEVEL 3  
40 A APOLAR NOTAA MCT EX 1 LEVEL 3 EX 2 LEVEL 3  
43 A APOLAR NOTAA MCT EX 1 LEVEL 3 EX 2 LEVEL 3  
46 A APOLAR NOTAA MCT EX 1 LEVEL 3 EX 2 LEVEL 3  
47 A APOLAR NOTAA MCT EX 1 LEVEL 3 EX 2 LEVEL 3  
50 A PIKAA H  
53 A APOLAR NOTAA MCT EX 1 LEVEL 3 EX 2 LEVEL 3  
54 A APOLAR NOTAA MCT EX 1 LEVEL 3 EX 2 LEVEL 3  
55 A PIKAA ED EX 1 LEVEL 3 EX 2 LEVEL 3  
56 A PIKAA QN EX 1 LEVEL 3 EX 2 LEVEL 3

57 A PIKAA G EX 1 LEVEL 3 EX 2 LEVEL 3

58 A ALLAAxc NOTAA M EX 1 LEVEL 3 EX 2 LEVEL 3  
59 A ALLAAxc NOTAA M EX 1 LEVEL 3 EX 2 LEVEL 3  
60 A ALLAAxc NOTAA M EX 1 LEVEL 3 EX 2 LEVEL 3  
61 A PIKAA G NOTAA M EX 1 LEVEL 3 EX 2 LEVEL 3  
62 A ALLAAxc NOTAA MWFY EX 1 LEVEL 3 EX 2 LEVEL 3  
63 A PIKAA LIVA EX 1 LEVEL 3 EX 2 LEVEL 3  
64 A PIKAA STP EX 1 LEVEL 3 EX 2 LEVEL 3

65 A PIKAA AST EX 1 LEVEL 3 EX 2 LEVEL 3  
66 A PIKAA ED EX 1 LEVEL 3 EX 2 LEVEL 3  
67 A APOLAR NOTAA MCT EX 1 LEVEL 3 EX 2 LEVEL 3  
68 A PIKAA A EX 1 LEVEL 3 EX 2 LEVEL 3  
69 A PIKAA K EX 1 LEVEL 3 EX 2 LEVEL 3  
70 A PIKAA QN EX 1 LEVEL 3 EX 2 LEVEL 3  
71 A PIKAA G EX 1 LEVEL 3 EX 2 LEVEL 3  
74 A APOLAR NOTAA MCT EX 1 LEVEL 3 EX 2 LEVEL 3  
78 A APOLAR NOTAA MCT EX 1 LEVEL 3 EX 2 LEVEL 3  
81 A APOLAR NOTAA MCT EX 1 LEVEL 3 EX 2 LEVEL 3  
84 A APOLAR NOTAA MCT EX 1 LEVEL 3 EX 2 LEVEL 3  
85 A APOLAR NOTAA MCT EX 1 LEVEL 3 EX 2 LEVEL 3

88 A PIKAA G EX 1 LEVEL 3 EX 2 LEVEL 3  
89 A PIKAA D EX 1 LEVEL 3 EX 2 LEVEL 3

93 A APOLAR NOTAA MCT EX 1 LEVEL 3 EX 2 LEVEL 3  
96 A APOLAR NOTAA MCT EX 1 LEVEL 3 EX 2 LEVEL 3  
97 A APOLAR NOTAA MCT EX 1 LEVEL 3 EX 2 LEVEL 3  
100 A APOLAR NOTAA MCT EX 1 LEVEL 3 EX 2 LEVEL 3  
103 A APOLAR NOTAA MCT EX 1 LEVEL 3 EX 2 LEVEL 3  
104 A APOLAR NOTAA MCT EX 1 LEVEL 3 EX 2 LEVEL 3  
107 A APOLAR NOTAA MCT EX 1 LEVEL 3 EX 2 LEVEL 3  
108 A PIKAA VLT EX 1 LEVEL 3 EX 2 LEVEL 3  
111 A PIKAA G EX 1 LEVEL 3 EX 2 LEVEL 3  
112 A APOLAR NOTAA MC EX 1 LEVEL 3 EX 2 LEVEL 3  
113 A ALLAAxc NOTAA MCH EX 1 LEVEL 3 EX 2 LEVEL 3  
114 A APOLAR NOTAA MCW EX 1 LEVEL 3 EX 2 LEVEL 3  
115 A APOLAR NOTAA MC EX 1 LEVEL 3 EX 2 LEVEL 3  
116 A ALLAAxc NOTAA MCH EX 1 LEVEL 3 EX 2 LEVEL 3  
117 A ALLAAxc NOTAA MCH EX 1 LEVEL 3 EX 2 LEVEL 3  
118 A POLAR NOTAA MCH EX 1 LEVEL 3 EX 2 LEVEL 3

### Contents of MnDPP paramters file (MDP.params).

NAME MDP  
IO\_STRING MDP Z  
TYPE LIGAND  
AA UNK  
ATOM MN1 Mn X 2.03  
ATOM N1 Npro X -0.34  
ATOM C4 aroC X -0.09  
ATOM C3 aroC X -0.09  
ATOM C2 aroC X -0.09  
ATOM C1 aroC X -0.09  
ATOM C20 CH1 X -0.06  
ATOM C19 aroC X -0.09  
ATOM N4 Npro X -0.34  
ATOM C16 aroC X -0.09  
ATOM C15 CH1 X -0.06  
ATOM C14 aroC X -0.09  
ATOM N3 Npro X -0.34  
ATOM C11 aroC X -0.09  
ATOM C10 CH1 X -0.06  
ATOM C9 aroC X -0.09  
ATOM N2 Npro X -0.34  
ATOM C6 aroC X -0.09  
ATOM C5 CH1 X -0.06  
ATOM C21 aroC X -0.09  
ATOM C22 aroC X -0.09  
ATOM C23 aroC X -0.09  
ATOM C24 aroC X -0.09  
ATOM C25 aroC X -0.09  
ATOM C26 aroC X -0.09  
ATOM H13 Haro X 0.14  
ATOM H12 Haro X 0.14  
ATOM H11 Haro X 0.14  
ATOM H10 Haro X 0.14  
ATOM H9 Haro X 0.14  
ATOM C7 aroC X -0.09  
ATOM C8 aroC X -0.09  
ATOM H4 Haro X 0.14  
ATOM H3 Haro X 0.14  
ATOM H21 Hapo X 0.12  
ATOM C12 aroC X -0.09  
ATOM C13 aroC X -0.09  
ATOM H6 Haro X 0.14  
ATOM H5 Haro X 0.14  
ATOM C27 aroC X -0.09  
ATOM C28 aroC X -0.09  
ATOM C29 aroC X -0.09  
ATOM C30 aroC X -0.09  
ATOM C31 aroC X -0.09  
ATOM C32 aroC X -0.09  
ATOM H18 Haro X 0.14  
ATOM H17 Haro X 0.14  
ATOM H16 Haro X 0.14  
ATOM H15 Haro X 0.14  
ATOM H14 Haro X 0.14

ATOM C17 aroC X -0.09  
ATOM C18 aroC X -0.09  
ATOM H8 Haro X 0.14  
ATOM H7 Haro X 0.14  
ATOM H20 Hapo X 0.12  
ATOM H1 Haro X 0.14  
ATOM H2 Haro X 0.14  
ATOM O1 OH X -0.63  
ATOM O2 OH X -0.63  
ATOM H19 Hpol X 0.46  
BOND\_TYPE N1 C4 4  
BOND\_TYPE N1 MN1 1  
BOND\_TYPE N2 C6 4  
BOND\_TYPE N2 C9 4  
BOND\_TYPE N2 MN1 1  
BOND\_TYPE N3 C11 4  
BOND\_TYPE N3 C14 4  
BOND\_TYPE N3 MN1 1  
BOND\_TYPE N4 C16 4  
BOND\_TYPE N4 C19 4  
BOND\_TYPE N4 MN1 1  
BOND\_TYPE N1 C1 4  
BOND\_TYPE C1 C2 4  
BOND\_TYPE C1 C20 1  
BOND\_TYPE C2 C3 4  
BOND\_TYPE C2 H1 1  
BOND\_TYPE C3 C4 4  
BOND\_TYPE C3 H2 1  
BOND\_TYPE C4 C5 1  
BOND\_TYPE C5 C6 1  
BOND\_TYPE C5 C21 1  
BOND\_TYPE C6 C7 4  
BOND\_TYPE C7 C8 4  
BOND\_TYPE C7 H3 1  
BOND\_TYPE C8 C9 4  
BOND\_TYPE C8 H4 1  
BOND\_TYPE C9 C10 1  
BOND\_TYPE C10 C11 1  
BOND\_TYPE C10 H21 1  
BOND\_TYPE C11 C12 4  
BOND\_TYPE C12 C13 4  
BOND\_TYPE C12 H5 1  
BOND\_TYPE C13 C14 4  
BOND\_TYPE C13 H6 1  
BOND\_TYPE C14 C15 1  
BOND\_TYPE C15 C16 1  
BOND\_TYPE C15 C27 1  
BOND\_TYPE C16 C17 4  
BOND\_TYPE C17 C18 4  
BOND\_TYPE C17 H7 1  
BOND\_TYPE C18 C19 4  
BOND\_TYPE C18 H8 1  
BOND\_TYPE C19 C20 1  
BOND\_TYPE C20 H20 1  
BOND\_TYPE C21 C22 4  
BOND\_TYPE C21 C26 4



BOND\_TYPE C22 C23 4  
 BOND\_TYPE C22 H9 1  
 BOND\_TYPE C23 C24 4  
 BOND\_TYPE C23 H10 1  
 BOND\_TYPE C24 C25 4  
 BOND\_TYPE C24 H11 1  
 BOND\_TYPE C25 C26 4  
 BOND\_TYPE C25 H12 1  
 BOND\_TYPE C26 H13 1  
 BOND\_TYPE C27 C28 4  
 BOND\_TYPE C27 C32 4  
 BOND\_TYPE C28 C29 4  
 BOND\_TYPE C28 H14 1  
 BOND\_TYPE C29 C30 4  
 BOND\_TYPE C29 H15 1  
 BOND\_TYPE C30 C31 4  
 BOND\_TYPE C30 H16 1  
 BOND\_TYPE C31 C32 4  
 BOND\_TYPE C31 H17 1  
 BOND\_TYPE C32 H18 1  
 BOND\_TYPE O1 O2 1  
 BOND\_TYPE O1 MN1 1  
 BOND\_TYPE O2 H19 1  
 CHI 1 MN1 O1 O2 H19  
 PROTON\_CHI 1 SAMPLES 3 60 -60 180 EXTRA 1 20  
 CHI 2 N1 MN1 O1 O2  
 NBR\_ATOM MN1  
 NBR\_RADIUS 8.931877  
 ICOOR\_INTERNAL MN1 0.000000 0.000000 0.000000 MN1 N1 C4  
 ICOOR\_INTERNAL N1 0.000000 180.000000 2.087270 MN1 N1 C4  
 ICOOR\_INTERNAL C4 0.000000 56.371551 1.373193 N1 MN1 C4  
 ICOOR\_INTERNAL C3 177.515637 70.406629 1.455625 C4 N1 MN1  
 ICOOR\_INTERNAL C2 1.566661 73.855123 1.352559 C3 C4 N1  
 ICOOR\_INTERNAL C1 -1.124409 71.868814 1.445290 C2 C3 C4  
 ICOOR\_INTERNAL C20 177.768493 53.653166 1.409649 C1 C2 C3  
 ICOOR\_INTERNAL C19 -176.972013 53.601851 1.408434 C20 C1 C2  
 ICOOR\_INTERNAL N4 1.083169 54.192482 1.367587 C19 C20 C1  
 ICOOR\_INTERNAL C16 177.810908 72.947127 1.365121 N4 C19 C20  
 ICOOR\_INTERNAL C15 -177.881074 52.781644 1.403404 C16 N4 C19  
 ICOOR\_INTERNAL C14 -3.668112 55.332539 1.429093 C15 C16 N4  
 ICOOR\_INTERNAL N3 -1.328292 54.968584 1.371531 C14 C15 C16  
 ICOOR\_INTERNAL C11 174.146485 73.690913 1.359684 N3 C14 C15  
 ICOOR\_INTERNAL C10 -174.985056 54.560631 1.413397 C11 N3 C14  
 ICOOR\_INTERNAL C9 7.361486 54.379416 1.407308 C10 C11 N3  
 ICOOR\_INTERNAL N2 -5.895345 53.816935 1.371225 C9 C10 C11  
 ICOOR\_INTERNAL C6 179.581462 72.993366 1.369356 N2 C9 C10  
 ICOOR\_INTERNAL C5 -179.028343 53.919569 1.391479 C6 N2 C9  
 ICOOR\_INTERNAL C21 -176.808097 63.243911 1.505945 C5 C6 N2  
 ICOOR\_INTERNAL C22 -109.292716 57.740197 1.380440 C21 C5 C6  
 ICOOR\_INTERNAL C23 177.994407 58.900184 1.389221 C22 C21 C5  
 ICOOR\_INTERNAL C24 1.191699 60.561117 1.365270 C23 C22 C21  
 ICOOR\_INTERNAL C25 -1.052689 59.402041 1.387834 C24 C23 C22  
 ICOOR\_INTERNAL C26 0.188671 59.803462 1.387120 C25 C24 C23  
 ICOOR\_INTERNAL H13 -179.464897 59.703319 1.089155 C26 C25 C24  
 ICOOR\_INTERNAL H12 -179.995959 60.111137 1.091098 C25 C24 C26  
 ICOOR\_INTERNAL H11 179.870079 60.309783 1.090442 C24 C23 C25

|                |     |             |           |          |     |     |     |
|----------------|-----|-------------|-----------|----------|-----|-----|-----|
| ICOOR_INTERNAL | H10 | -179.863327 | 59.722694 | 1.090177 | C23 | C22 | C24 |
| ICOOR_INTERNAL | H9  | 179.939547  | 60.498913 | 1.089810 | C22 | C21 | C23 |
| ICOOR_INTERNAL | C7  | 178.364013  | 71.095530 | 1.454731 | C6  | N2  | C5  |
| ICOOR_INTERNAL | C8  | 0.043108    | 72.453272 | 1.331036 | C7  | C6  | N2  |
| ICOOR_INTERNAL | H4  | -179.481883 | 53.712913 | 1.089647 | C8  | C7  | C6  |
| ICOOR_INTERNAL | H3  | -179.948925 | 53.798913 | 1.090006 | C7  | C6  | C8  |
| ICOOR_INTERNAL | H21 | -179.987731 | 62.835262 | 1.031688 | C10 | C11 | C9  |
| ICOOR_INTERNAL | C12 | 176.490132  | 69.431136 | 1.438018 | C11 | N3  | C10 |
| ICOOR_INTERNAL | C13 | -1.923524   | 73.061889 | 1.351686 | C12 | C11 | N3  |
| ICOOR_INTERNAL | H6  | -178.574685 | 53.302880 | 1.090296 | C13 | C12 | C11 |
| ICOOR_INTERNAL | H5  | -179.959190 | 53.505095 | 1.089966 | C12 | C11 | C13 |
| ICOOR_INTERNAL | C27 | 178.094564  | 62.178703 | 1.483561 | C15 | C16 | C14 |
| ICOOR_INTERNAL | C28 | -54.182359  | 58.821963 | 1.399737 | C27 | C15 | C16 |
| ICOOR_INTERNAL | C29 | 178.735969  | 58.785946 | 1.400978 | C28 | C27 | C15 |
| ICOOR_INTERNAL | C30 | 1.067477    | 60.080629 | 1.378049 | C29 | C28 | C27 |
| ICOOR_INTERNAL | C31 | 1.105717    | 60.049092 | 1.384083 | C30 | C29 | C28 |
| ICOOR_INTERNAL | C32 | -3.040842   | 60.753543 | 1.387997 | C31 | C30 | C29 |
| ICOOR_INTERNAL | H18 | -176.930664 | 61.364413 | 1.089552 | C32 | C31 | C30 |
| ICOOR_INTERNAL | H17 | 179.905796  | 59.666518 | 1.089578 | C31 | C30 | C32 |
| ICOOR_INTERNAL | H16 | -179.960940 | 60.032775 | 1.090250 | C30 | C29 | C31 |
| ICOOR_INTERNAL | H15 | -179.977656 | 59.996812 | 1.089841 | C29 | C28 | C30 |
| ICOOR_INTERNAL | H14 | 179.966443  | 60.554384 | 1.089740 | C28 | C27 | C29 |
| ICOOR_INTERNAL | C17 | 179.549635  | 70.870565 | 1.464675 | C16 | N4  | C15 |
| ICOOR_INTERNAL | C18 | -1.717415   | 73.609906 | 1.364694 | C17 | C16 | N4  |
| ICOOR_INTERNAL | H8  | -178.970404 | 53.489861 | 1.089283 | C18 | C17 | C16 |
| ICOOR_INTERNAL | H7  | 179.922625  | 53.169359 | 1.089396 | C17 | C16 | C18 |
| ICOOR_INTERNAL | H20 | 179.999802  | 63.228920 | 1.032243 | C20 | C1  | C19 |
| ICOOR_INTERNAL | H1  | 179.969853  | 54.013494 | 1.090463 | C2  | C3  | C1  |
| ICOOR_INTERNAL | H2  | -179.967048 | 53.093199 | 1.090850 | C3  | C4  | C2  |
| ICOOR_INTERNAL | O1  | -87.313951  | 86.735033 | 1.771285 | MN1 | N1  | C4  |
| ICOOR_INTERNAL | O2  | -88.797651  | 56.646661 | 1.251612 | O1  | MN1 | N1  |
| ICOOR_INTERNAL | H19 | 174.201993  | 74.629581 | 0.986709 | O2  | O1  | MN1 |

## References

1. Polizzi, N. F.; Wu, Y.; Lemmin, T.; Maxwell, A. M.; Zhang, S.-Q.; Rawson, J.; Beratan, D. N.; Therien, M. J.; DeGrado, W. F., De novo design of a hyperstable non-natural protein–ligand complex with sub-Å accuracy. *Nat. Chem.* **2017**, *9* (12), 1157-1164.
2. Zhou, J.; Grigoryan, G., Rapid search for tertiary fragments reveals protein sequence-structure relationships. *Protein Sci.* **2015**, *24* (4), 508-24.
3. Engel, D. E.; DeGrado, W. F., Alpha-alpha linking motifs and interhelical orientations. *Proteins* **2005**, *61* (2), 325-37.
4. Lahr, S. J.; Engel, D. E.; Stayrook, S. E.; Maglio, O.; North, B.; Geremia, S.; Lombardi, A.; DeGrado, W. F., Analysis and design of turns in alpha-helical hairpins. *J. Mol. Biol.* **2005**, *346* (5), 1441-54.
5. Bradley, P.; Misura, K. M.; Baker, D., Toward high-resolution de novo structure prediction for small proteins. *Science* **2005**, *309* (5742), 1868-71.
6. The PyMOL Molecular Graphics System, Version 2.0 Schrödinger, LLC.
7. Gassner, G. T., The styrene monooxygenase system. *Method. Enzymol.* **2019**, *620*, 423-453.
8. Otwinowski, Z.; Minor, W., Processing of X-ray diffraction data collected in oscillation mode. *Macromolecular Crystallography, Pt A* **1997**, *276*, 307-326.

9. Adams, P. D.; Afonine, P. V.; Bunkóczi, G.; Chen, V. B.; Davis, I. W.; Echols, N.; Headd, J. J.; Hung, L.-W.; Kapral, G. J.; Grosse-Kunstleve, R. W.; McCoy, A. J.; Moriarty, N. W.; Oeffner, R.; Read, R. J.; Richardson, D. C.; Richardson, J. S.; Terwilliger, T. C.; Zwart, P. H., PHENIX: a comprehensive Python-based system for macromolecular structure solution. *Acta crystallographica. Section D, Biological crystallography* **2010**, *66* (2), 213-221.
10. Emsley, P.; Cowtan, K., Coot: model-building tools for molecular graphics. *Acta crystallographica. Section D, Biological crystallography* **2004**, *60* (Pt 12 Pt 1), 2126-2132.
